1  
2  
3 **Spt4 drives cellular senescence by activating non-coding RNA transcription in**  
4 **ribosomal RNA gene clusters**

5  
6 Masaaki Yokoyama<sup>1,2</sup>, Mariko Sasaki<sup>1,2,4</sup>, Takehiko Kobayashi<sup>1,2,3,4</sup>.

7  
8  
9 <sup>1</sup>Laboratory of Genome Regeneration, Institute for Quantitative Biosciences (IQB), The  
10 University of Tokyo, 1-1-1 Yayoi, Bunkyo-ku, Tokyo 113-0032, JAPAN

11 <sup>2</sup>Department of Biological Sciences, Graduate School of Science, University of Tokyo, 1-1-1  
12 Yayoi, Bunkyo-ku, Tokyo 113-0032, JAPAN

13 <sup>3</sup>Collaborative Research Institute for Innovative Microbiology, The University of Tokyo, 1-1-1  
14 Yayoi, Bunkyo-ku, Tokyo 113-0032, JAPAN

15  
16 <sup>4</sup>Correspondence to:

17 [sasakim@iqb.u-tokyo.ac.jp](mailto:sasakim@iqb.u-tokyo.ac.jp)

18 [tako2015@iqb.u-tokyo.ac.jp](mailto:tako2015@iqb.u-tokyo.ac.jp) (lead contact)

19  
20  
21  
22 Key words: ribosomal RNA gene (rDNA), lifespan, budding yeast, genome instability,  
23 senescence, noncoding RNA transcription, Spt4

24 **SUMMARY**

25 Genome instability can drive aging in many organisms. The ribosomal RNA gene (rDNA) cluster  
26 is one of the most unstable regions in the genome. Replicative lifespan in budding yeast is  
27 correlated to rDNA stability, suggesting that the rDNA locus produces an aging signal. To  
28 understand the underlying mechanism, we looked for yeast mutants with more stable rDNA and  
29 longer lifespan than wild-type cells. We reveal that absence of a transcription elongation factor,  
30 Spt4, resulted in an increased rDNA stability, a reduced activity of the regulatory E-pro promoter  
31 in the rDNA, and extended replicative lifespan in a *SIR2*-dependent manner. Spt4-dependent  
32 lifespan restriction was abolished in the absence of non-coding RNA transcription at the E-pro  
33 locus. The amount of Spt4 increases and its function becomes more important as cells age. These  
34 findings suggest that Spt4 is a promising aging factor that accelerates cellular senescence  
35 through rDNA instability driven by non-coding RNA transcription.

## 36 **Introduction**

37 Aging is the decline of the biological functions, which occurs over time and involves  
38 complex biological processes (López-Otín et al., 2013; McHugh and Gil, 2018; Di Micco et al.,  
39 2021). Aging is the critical risk factor that trigger the onset of many diseases such as cancer,  
40 neurological diseases, and cardiovascular diseases. Therefore, understanding the molecular  
41 mechanisms of aging is important for designing therapies to delay or prevent aging-related  
42 diseases. One of the causes of aging is cellular senescence (López-Otín *et al.*, 2013; McHugh and  
43 Gil, 2018; Di Micco *et al.*, 2021). Budding yeast, *Saccharomyces cerevisiae*, where genetic  
44 manipulation experiments can be easily done, has been used as a model organism to elucidate the  
45 molecular mechanisms underlying cellular senescence (Sinclair et al., 1998b; Longo et al., 2012;  
46 He et al., 2018).

47 The rDNA encodes ribosomal RNA transcription unit(s) and is one of the highly  
48 abundant sequences that are organized into array(s) of tandem repeats at a single or several loci  
49 in eukaryotic genomes (reviewed in (Kobayashi, 2011)). Due to this repetitive arrangement, the  
50 rDNA can change in copy number. The budding yeast genome contains ~150 rDNA copies at a  
51 single locus on chr XII (Fig. 1A). Each copy contains 35S and 5S rRNA transcription units that  
52 are separated by two intergenic spacers (IGSs). The IGS1 contains a replication fork barrier  
53 (RFB) site and an RNA polymerase (RNAP) II-dependent, bi-directional promoter, E-pro, that  
54 synthesizes non-coding RNAs and the IGS2 contains an origin of DNA replication and cohesin-  
55 associated region (Fig. 1A). After DNA replication is initiated, the replication fork moving in the  
56 direction opposite to the 35S rDNA is arrested at the RFB site bound by a Fob1 protein, leading  
57 to formation of DNA double-strand breaks (DSBs) (Brewer et al., 1992; Kobayashi et al., 1992;  
58 Kobayashi and Horiuchi, 1996; Weitao et al., 2003; Burkhalter and Sogo, 2004; Kobayashi et al.,

59 2004).

60 Previous studies have identified two major processes that dictate the outcomes of the  
61 DSB repair as to whether it results in rDNA copy number changes and thus rDNA instability.  
62 First, end resection of DSBs, an initiating event for homologous recombination (HR), is normally  
63 suppressed at the RFB (Sasaki and Kobayashi, 2017). Thus, removal of this suppression can lead  
64 to HR-mediated repair (Fig. 1A) (Sasaki and Kobayashi, 2017). If DSB repair engages the rDNA  
65 copy at an aligned position on the sister chromatid, it does not lead to a change in the rDNA copy  
66 number (Kobayashi, 2011). However, if DSB repair involves a misaligned copy on the sister  
67 chromatid or another copy on the same chromosome, expansion or contraction of the rDNA array  
68 will be the outcome. Furthermore, such DSB repair can lead to the production of  
69 extrachromosomal rDNA circles (ERCs). Second, transcription of non-coding RNA from E-pro  
70 is normally repressed by a histone deacetylase Sir2, which results in stable association of cohesin  
71 to the rDNA (Fig. 1A) (Kobayashi *et al.*, 2004; Kobayashi and Ganley, 2005). This repression is  
72 relieved by the absence of Sir2 or in a strain with a low number of rDNA units where *SIR2*  
73 expression is reduced, leading to enhanced transcription from E-pro, disruption of cohesin  
74 association and changes in rDNA copy number (Kobayashi *et al.*, 2004; Kobayashi and Ganley,  
75 2005; Iida and Kobayashi, 2019).

76 The budding yeast cells produce a finite number of daughter cells before death, which  
77 defines the replicative lifespan (Sinclair et al., 1998a). The replicative lifespan of cells lacking  
78 *SIR2* is shortened to half of that of the wild-type strain, while it is extended by over-production  
79 of this protein (Kaeberlein et al., 1999). The amount of this protein decreases in old cells (Fine et  
80 al., 2019). Therefore, Sir2 works as an anti-aging factor. On the contrary, in the *fob1* mutant, the  
81 rDNA is stable and the lifespan is extended by ~60% compared to the wild-type strain

82 (Kobayashi et al., 1998; Takeuchi et al., 2003). In addition, a strain in which the E-pro is  
83 replaced with a galactose-inducible bi-directional *GALI/10* promoter, hereafter referred to as the  
84 Gal-pro strain, has stable rDNA and longer lifespan in glucose medium while the opposite is  
85 observed when transcription is induced by the addition of galactose in the medium (Kobayashi  
86 and Ganley, 2005; Saka et al., 2013). These findings demonstrate that rDNA stability can dictate  
87 replicative lifespan.

88 To better understand how cellular senescence can be regulated via the rDNA locus, we  
89 aim to identify factors that are involved in the control of both processes. The presence of anti-  
90 aging factors such as Sir2 inspired us to find proteins with the opposite function, which  
91 contribute to aging by destabilizing the rDNA cluster and would be present in increased amounts  
92 or activated in old cells. To identify such aging factors, we screened for long-lived yeast mutants  
93 with stable rDNA and found that cells lacking *SPT4* showed increased rDNA stability and  
94 extended lifespan.

95 The progression of the RNAP II transcription machineries can be paused by various  
96 factors, including the nucleosomes that are intrinsic barriers to RNAP II progression (Ehara and  
97 Sekine, 2018; Kujirai and Kurumizaka, 2020). To ensure efficient transcription, organisms have  
98 evolved factors that enhance the processivity of RNAP II. Spt4 forms a heterodimer with Spt5,  
99 known as the Spt4-Spt5 complex (and, in metazoans, as DSIF, the DRB sensitivity-inducing  
100 factor - DRB is 5,6-dichloro-1-beta-d-ribofuranosyl-benzimidazole). The Spt4-Spt5 complex  
101 interacts with RNAP II and plays an important role in facilitating transcription by RNA  
102 polymerase II in the context of chromatin structures (Hartzog and Fu, 2013; Ehara and Sekine,  
103 2018; Kujirai and Kurumizaka, 2020; Decker, 2021). The Spt4-Spt5 complex also interacts with  
104 RNAP I and localizes to the rDNA, while the influence of this complex on rRNA transcription

105 can be both positive and negative (Schneider et al., 2006; Anderson et al., 2011; Lepore and  
106 Lafontaine, 2011; Viktorovskaya et al., 2011). In cells lacking Spt4, transcription of non-coding  
107 RNA from E-pro was reduced, while rDNA stability and replicative lifespan increased in a  
108 manner dependent on *SIR2*, *FOBI*, and E-pro activity. Moreover, in old cells, an increase in the  
109 amount of Spt4 was observed, which possibly enhances the impact of the protein on facilitating  
110 transcription from E-pro as cells age, accelerating cellular senescence. Our results suggest that  
111 Spt4 is a promising aging factor that drives cellular senescence through destabilizing rDNA in  
112 budding yeast.

113

## 114 **Results**

### 115 **The Spt4-Spt5 complex enhances rDNA instability and shortens the replicative lifespan.**

116 In this study, we sought to identify the putative factors that spread the aging signal and restrict  
117 the replicative lifespan by destabilizing rDNA. Cells lacking such factors would display  
118 increased lifespan and rDNA stability. A previous study has determined the replicative lifespan of  
119 4,698 mutant strains that lack non-essential genes for viability and identified 238 mutant strains  
120 with increased lifespan (McCormick et al., 2015). Among them, 30 mutants lack a gene that has  
121 an annotated function in DNA metabolism, such as recombination, replication, and repair. We  
122 examined the degree of rDNA stability in these mutants by measuring the amount of ERCs (Fig.  
123 1A), which are often produced during rDNA copy number changes and can be used as an  
124 indicator of rDNA instability (Sinclair and Guarente, 1997; Kaeberlein *et al.*, 1999; Ganley et al.,  
125 2009). Measurements of ERCs identified 7 mutants with, compared to wild-type cells, a  
126 statistically significant increase in ERCs and 12 mutants with decreased ERC levels, the latter of  
127 which displayed the expected phenotype for cells that lack aging factors of our interest (Fig. 1B,

128 Fig. S1A–D).

129 Cells lacking Spt4 accumulated the least amount of ERCs among the mutants examined  
130 (Fig. 1B). Spt4 forms a heterodimer with Spt5, known as the Spt4-Spt5 complex and functions as  
131 a transcription elongation factor that facilitates transcription by RNA polymerase II (Hartzog and  
132 Fu, 2013; Ehara and Sekine, 2018; Kujirai and Kurumizaka, 2020; Decker, 2021). Spt4 also  
133 facilitates rRNA transcription by RNA polymerase I and is localized across the rDNA region  
134 (Schneider *et al.*, 2006; Anderson *et al.*, 2011; Lepore and Lafontaine, 2011). Our study revealed  
135 that Spt4 has a novel function destabilizing rDNA. We sought to understand how this protein  
136 reduces rDNA stability and induces cellular senescence.

137 To determine whether Spt4 enhances rDNA instability alone or through the Spt4-Spt5  
138 complex, we tested the involvement of Spt5 in the regulation of rDNA stability. As *SPT5* is an  
139 essential gene, two temperature sensitive alleles, *spt5*-S324P, E427K and *spt5*-C292R, were used  
140 (Anderson et al. 2011). Serine 324, substituted in the first mutant, is located within the conserved  
141 NusG-like domain of Spt5 and is required for binding to Spt4 (Guo et al., 2008). Thus, the *spt5*-  
142 S324P, E427K mutant is deficient with the Spt4-Spt5 complex formation. A point mutation in the  
143 second allele results in substitution of cysteine 292, which, however, does not lie on the interface  
144 with Spt4 (Anderson et al. 2011). Because the *spt5*-C292R mutant shows a reduction in the  
145 synthesis rate of rRNA, this allele compromises the function of Spt5 in the Spt4-Spt5 complex  
146 (Anderson et al. 2011). These strains were grown at 27°C and analyzed for ERCs. The level of  
147 ERCs in the *spt4*Δ mutant was ~10-fold lower than that in wild-type cells but this level was still  
148 ~5-fold higher than that in the mutant lacking *FOBI* (Fig. 1C, 1D), which is responsible for  
149 DNA replication fork arrest and ERC production (Kobayashi and Horiuchi, 1996; Defossez et al.,  
150 1999). The two *spt5* mutants showed a statistically significant reduction in the level of ERCs,

151 compared to wild type (Fig. 1C, 1D). The ERC levels in the *spt5-C292R* and *spt5-S324P, E427K*  
152 mutants were ~2-fold lower and ~2-fold higher than in the *spt4Δ* mutant, respectively, but these  
153 mutual differences were not statistically significant. Overall, these results demonstrate that Spt4  
154 and Spt5 function as a complex when inducing rDNA instability.

155

### 156 **Spt4-mediated rDNA destabilization depends on *SIR2*.**

157 We examined whether reduced ERC formation paralleled an increase in rDNA stability in the  
158 *spt4Δ* mutant by assessing the degree of size heterogeneity of chr XII by pulsed-field gel  
159 electrophoresis (PFGE). The band of chr XII in the *spt4Δ* mutant appeared as sharp as that in the  
160 *fob1Δ* mutant defective in rDNA copy number changes and seemed sharper than that in wild-type  
161 cells in the *SIR2* background (Fig. 2A). A previous study reported that the average rDNA copy  
162 number is reduced in absence of Spt4 by ~3 fold, compared to wild-type cells (Schneider *et al.*,  
163 2006). We observed some variabilities in the size of chr XII among four independent *spt4Δ* clones  
164 constructed for our study, but not matching a 3-fold change in the case of samples with increased  
165 or decreased rDNA copy number (Fig. 2A, WT vs. *spt4Δ* in the *SIR2* background).

166 To determine more precisely the effect of *SPT4* deletion on rDNA stability, we  
167 overexpressed Fob1 by placing the *FOB1* ORF under the control of the constitutive *ADHI*  
168 promoter, which led to ~8-fold increase in Fob1 protein level (Fig. 2B, 2C). Compared to the  
169 wild type (Fig. 2A, lanes WT/*SIR2*), Fob1 overexpression resulted in smearing of the chr XII  
170 band (Fig. 2D, lanes WT/*ADHIp-FOB1*). Upon deletion of *SPT4* from the *ADHIp-FOB1* strain,  
171 the chr XII band became far less smeared (Fig. 2D). Therefore, *SPT4* induces copy number  
172 changes in the chromosomal rDNA array, and thus rDNA instability.

173 The histone deacetylase Sir2 is a key player in the suppression of both rDNA instability



174 and cellular senescence (Kaeberlein *et al.*, 1999; Kobayashi *et al.*, 2004), thus with a role  
175 opposite to that of Spt4. To gain insight into the relationship between *SPT4* and *SIR2* during  
176 processes that affect rDNA stability, we constructed a double mutant of *spt4* $\Delta$  and *sir2* $\Delta$  and  
177 examined rDNA stability (Fig. 2A, 2E, 2F). In the PFGE assay, the chr XII band of *sir2* $\Delta$  cells  
178 was extremely smeared (Fig. 2A, lanes *WT/sir2* $\Delta$ ), consistent with a previous study (Kobayashi  
179 *et al.*, 2004). The chr XII band in two of the four independent *sir2* $\Delta$  *spt4* $\Delta$  clones examined, was  
180 as smeared as that in the *sir2* $\Delta$  clones (Fig. 2A, lanes marked by 'normal' vs. *WT/sir2* $\Delta$ ), while  
181 the other two clones showed sharper bands but carried a much shorter chr XII (Fig. 2A, lanes  
182 marked by 'small'). It remains unclear whether the reduction in the rDNA cluster size is a direct  
183 effect of constructing the *SPT4* deletion in the *sir2* $\Delta$  strain background. It is known that  
184 transformation procedures that are used for gene replacement can induce rDNA copy number  
185 changes (Kwan *et al.*, 2016). Thus, it is likely that these two clones have spontaneously lost  
186 rDNA copies during strain construction. Because chr XII in these clones migrated much faster  
187 than the *sir2* $\Delta$  and other two *sir2* $\Delta$  *spt4* $\Delta$  clones (Fig. 2A), it was difficult to compare the size  
188 heterogeneity of chr XII band because resolution of DNA molecules is expected to be very  
189 different between two regions. Thus, it appears that removal of Spt4 protein does not counteract  
190 rDNA instability caused by *SIR2* deletion.

191 Deletion of *SPT4* from the WT (*SIR2*) cells resulted in a decrease in ERCs by ~5-fold  
192 (Fig. 2E, 2F). However, the ERC level in the *spt4* $\Delta$  *sir2* $\Delta$  double mutant was similar or only  
193 slightly reduced, compared to the *sir2* $\Delta$  single mutant (Fig. 2F, WT vs. *spt4* $\Delta$  in the *sir2* $\Delta$   
194 background), consistent with the outcome of the PFGE analysis (Fig. 2A). Taken together, these  
195 findings indicate that Spt4-mediated enhancement of rDNA instability depends on *SIR2*. In other  
196 words, Spt4 functions downstream of Sir2 in the regulation of rDNA stability.

197

198 **Spt4 enhances transcription of non-coding RNA from E-pro.**

199 Previous studies have identified several factors that impact rDNA stability. Fob1-dependent  
200 replication fork arrest at the RFB site leads to formation of DSBs (Weitao *et al.*, 2003;  
201 Burkhalter and Sogo, 2004; Kobayashi *et al.*, 2004) (Fig. 1A). When these DSBs are resected,  
202 HR-dependent repair is taken place that can induce rDNA copy number changes (Sasaki and  
203 Kobayashi, 2017). We first examined the frequency of replication fork arrest by two-dimensional  
204 (2D) agarose gel electrophoresis. Genomic DNA was isolated from WT and *spt4Δ* mutant cells  
205 and digested with the restriction enzyme *Nhe* I (Fig. 3A). DNA fragments were separated by  
206 agarose gel electrophoresis according to molecular mass in the first dimension and then  
207 according to molecular mass and shape in the second dimension, followed by Southern blotting.  
208 The level of arrested forks in total replication intermediates was similar between WT and *spt4Δ*  
209 strains, thereby indicating that RFB activity is not reduced in the *spt4Δ* mutant (Fig. 3B, 3C).

210 We also determined the DSB frequency at the RFB site by separating genomic DNA  
211 digested with the restriction enzyme *Bgl* II by conventional agarose gel electrophoresis and  
212 subsequent Southern blotting. The DSB frequency was reduced in the *spt4Δ* mutant by ~30%,  
213 compared to WT cells (Fig. 3D, 3E). Deletion of *SPT4* also caused a reduction in DSB frequency  
214 in the *sir2Δ* background but the difference was not statistically significant (Fig. 3D, 3E). We did  
215 not use cells synchronized in S phase for DSB assays, which made assessing the frequency of  
216 resected DSBs unreliable as resected DSB intermediates were mostly below the detection limit  
217 of Southern blotting (Fig. 3D, lower panel). Thus, the reduction of DSBs and possible reduction  
218 of DSB end resection might be reflected in the increased rDNA stability in the *spt4Δ* mutant,  
219 which needs to be determined in future studies.

220 Sir2 represses transcription of non-coding RNA from E-pro when the copy number is  
221 normal (Kobayashi and Ganley, 2005; Iida and Kobayashi, 2019). Relief of this repression  
222 activates transcription from E-pro, which induces disruption of cohesin binding and rDNA  
223 instability during DSB repair (Fig. 1A) (Kobayashi *et al.*, 2004; Kobayashi and Ganley, 2005;  
224 Saka *et al.*, 2013). Chromatin immunoprecipitation experiments indicate that Spt4 is localized  
225 across the rDNA, being enriched around the middle of the 35S rDNA gene and IGS1 (Lepore  
226 and Lafontaine, 2011). Spt5 is also localized across the rDNA but, interestingly, is mostly  
227 enriched at the IGS1 near the RFB and E-pro (Lepore and Lafontaine, 2011). This raises the  
228 possibility that Spt4, as part of the Spt4-Spt5 complex functions to destabilize the rDNA through  
229 transcription regulation of non-coding RNA from E-pro. To test this possibility, we detected the  
230 noncoding RNA transcripts by Northern blotting with strand-specific probes (Fig. 3A). There are  
231 three major non-coding RNA species that are transcribed in intergenic spacer regions: IGS1-F  
232 and IGS1-R are transcribed from E-pro toward the 5S rRNA gene and the RFB site, respectively  
233 (Kobayashi and Ganley, 2005) ; IGS2-R is synthesized toward the RFB site from the promoter  
234 near an origin of DNA replication (Houseley et al. 2007).

235 The IGS1-F transcripts that are synthesized from E-pro toward the 5S rRNA gene were  
236 reduced by ~40% in the *spt4* $\Delta$  mutant (Fig. 3F, 3G), although this difference was not statistically  
237 significant. The level of IGS1-R transcript was detected below detection limit of Northern  
238 blotting, making it difficult to quantify signal intensities accurately. Transcription of IGS2-R,  
239 although it was not synthesized from E-pro, was also suppressed by 40% in the *spt4* $\Delta$  strain,  
240 compared to WT, but this difference was again not statistically significant (Fig. 3H, 3I).

241 As shown above, overexpression of *FOB1* in the *ADH1p-FOB1* strain induces smearing  
242 of chr XII band to the degree similar to that seen in the *sir2* $\Delta$  mutant (Fig. 2D–2F). A previous

243 study shows that overexpression of *FOB1* causes weakened silencing of a marker gene inserted  
244 in the IGS1 and proposes that over-abundance of Fob1 causes inappropriate interactions of Fob1  
245 with the RENT complex (Buck et al., 2016), which is composed of Sir2, Net1, and Cdc14, is  
246 recruited to IGS1 and enhances gene silencing (Huang and Moazed, 2003). Consistent with the  
247 previous finding, overexpression of *FOB1* led to de-repression of transcription from E-pro, as the  
248 *ADH1p-FOB1* strain showed ~4-fold increase in the IGS1-F transcripts, compared to wild-type  
249 cells (Fig. 3J, 3K, WT/*FOB1* vs. WT/*ADH1p-FOB1*). As a cause of this phenotype, we identified  
250 that the Sir2 protein level was reduced by ~85% in the *ADH1p-FOB1* cells, compared to the WT  
251 (*FOB1*) cells (Fig. 3L, 3M), indicating that Fob1 overexpression causes a reduction in the Sir2  
252 protein level, enhancing transcription from E-pro. Deletion of *SPT4* from the *ADH1p-FOB1*  
253 strain did not alter the Sir2 protein level but caused a decrease in the level of the IGS1-F  
254 transcripts by ~4-fold, compared to the *ADH1p-FOB1* strain (Fig. 3J–3M). Taken together, these  
255 findings indicate that Spt4 functions to enhance transcription from E-pro.

256 The IGS1-F and IGS2-R transcripts were increased by ~7- and 8-fold in the *sir2*Δ  
257 mutant, respectively, compared to wild-type cells (Fig. 3F-3I). Thus, Sir2 regulates transcription  
258 of non-coding RNA not just from E-pro but also from the promoter in the IGS2. Deletion of  
259 *SPT4* from the *sir2*Δ mutant did not result in a decrease in transcription activity that was  
260 significant or comparable to that observed in the *SIR2* background (Fig. 3F–3I). The possibility  
261 that Spt4 represses *SIR2* expression would explain the similar phenotype for the *sir2*Δ *spt4*Δ  
262 double and *sir2* single mutant. However, this possibility was excluded, because the level of Sir2  
263 was not altered by deletion of *SPT4* (Fig. 3L, 3M). Therefore, Spt4-mediated enhancement of  
264 transcription of non-coding RNA from E-pro depends on *SIR2*. Furthermore, the finding that  
265 only in *SIR2* cells the absence of Spt4 affected non-coding RNA transcription from E-pro is

266 consistent with Spt4 dependence on *SIR2* for the regulation of rDNA stability.

267

268 **Spt4-mediated shortening of the replicative lifespan depends on *SIR2* and *FOB1*.**

269 The lifespan of the *spt4* $\Delta$  mutant is reported to be longer than that of the wild type, but the  
270 mechanism causing this remains unknown (Smith et al., 2008; McCormick *et al.*, 2015). To  
271 explore how lifespan is extended in the *spt4* $\Delta$  mutant, we performed epistasis analysis of *SPT4*  
272 with known lifespan-modulating genes. Namely, we examined genetic interaction with *FOB1*  
273 that shortens lifespan and promotes rDNA instability and *SIR2* that extends lifespan and  
274 promotes rDNA stability (Defossez *et al.*, 1999; Kaeberlein *et al.*, 1999). Consistent with  
275 previous findings, the *sir2* $\Delta$  and *fob1* $\Delta$  mutants had shortened and extended lifespans,  
276 respectively (Fig. 4A, 4B). Deletion of *SPT4* led to an extension of lifespan in the wild-type  
277 background, consistent with previous findings (Smith *et al.*, 2008; McCormick *et al.*, 2015). This  
278 lifespan extension was comparable to that of cells lacking Fob1. However, deletion of *SPT4* from  
279 the *fob1* $\Delta$  background did not result in lifespan extension (Fig. 4A, 4B). Similarly, deletion of  
280 *SPT4* from the *sir2* $\Delta$  background did not lead to extension of lifespan (Fig. 4A, 4B). These  
281 findings indicate that Spt4 acts in the same pathway as Sir2 and Fob1 during the regulation of  
282 senescence.

283

284 **Spt4 restricts replicative lifespan through stimulation of non-coding RNA transcription**  
285 **from E-pro.**

286 E-pro activity induces rDNA instability and cellular senescence (Kobayashi and Ganley, 2005;  
287 Saka et al., 2013). Indeed, enhanced transcription of non-coding RNA in the *ADH1p-FOB1*  
288 strain was accompanied with shortening of replicative lifespan, compared to the wild-type strain

289 (Fig. 3J, 3K and Fig. 4). Furthermore, deletion of *SPT4* from the *ADH1p-FOB1* strain led to  
290 reduced transcription of non-coding RNA and rDNA instability (Fig. 2D–2F, 3J, 3K). The  
291 *ADH1p-FOB1 spt4*Δ strain clearly showed extended lifespan on the survival curve, compared to  
292 the *ADH1-FOB1* strain (Fig. 4A). It should be noted that although the multiple comparisons tests  
293 did not show statistical significance in the mean lifespan between *ADH1p-FOB1* and *ADH1p-*  
294 *FOB1 spt4*Δ strains (Fig. 4B), the difference was statistically significant ( $P < 0.001$  in the Mann-  
295 Whitney, nonparametric test). These results point to the possibility that reduced transcription  
296 from E-pro may be a primary determinant of lifespan extension in the absence of Spt4. To test  
297 this possibility, we used the Gal-pro strain (Fig. 5A), in which the E-pro is replaced by the  
298 galactose-inducible bi-directional *GAL1/10* promoter in all rDNA copies (Kobayashi and Ganley  
299 2005). In the Gal-pro strain, transcription of noncoding RNA is repressed in glucose-containing  
300 media but it is induced in medium with galactose as the carbon source (Kobayashi and Ganley,  
301 2005) (Fig. 5B). In the Gal-pro strain, the rDNA is stabilized and lifespan is extended when cells  
302 are grown in the presence of glucose, compared to cells cultured in galactose-containing media  
303 (Kobayashi and Ganley, 2005; Saka *et al.*, 2013).

304 In the presence of glucose, non-coding RNA transcription was kept at a level below the  
305 detection limit of Northern blotting in both Gal-pro and Gal-pro *spt4*Δ strains (Fig. 5B).  
306 Furthermore, the level of ERCs was extremely low in the Gal-pro strain, compared to the E-pro  
307 strain, and this level did not alter in the absence of Spt4 (Figs. 5C, 5D, lanes Gal-pro *spt4*Δ). The  
308 lifespan of the Gal-pro strain was longer than that of the E-pro strain, as described previously  
309 (Saka *et al.* 2013). Although deletion of *SPT4* led to an extension of the replicative lifespan of E-  
310 pro cells, this deletion did not further extend the replicative lifespan of Gal-pro cells (Fig. 5E,  
311 5F). Therefore, transcription of non-coding RNA depending on the presence of Spt4 induces

312 shortening of the replicative lifespan, which is connected to rDNA stability.

313

314 **Spt4 protein level increases in old cells.**

315 A previous study demonstrated that the Sir2 protein level decreases by ~80% in cells that have  
316 divided ~6 times, which is in line with its anti-aging function (Fine *et al.*, 2019). We also  
317 examined the alteration in protein levels by comparing 'old' cells grown for 7 to 8 divisions, to  
318 'young' cells that had not divided or just once. To this end, we tagged the ORFs of *SIR2* or *SPT4*  
319 with a triple HA epitope and separated young from old cells using magnetic streptavidin beads  
320 that only bound to cell-surface proteins of old cells after their initial exposure to a biotinylation  
321 reagent. Tagged protein levels were assessed by Western blotting. Using this approach, we also  
322 detected a statistically significant reduction in Sir2 levels as cells age (Fig. 6A, 6B). Possibly due  
323 to experimental differences, the ~40% reduction we observed was less than reported.

324         If Spt4 is an aging factor, it is feasible that its protein level increases as cells undergo  
325 more cell divisions. In agreement with this hypothesis, we found that the level of HA-tagged  
326 Spt4 protein was elevated in old cells by ~3-fold, when this was compared to the abundance of  
327 Spt4 in young cells (Fig. 6C, 6D). As reported previously (Pal *et al.*, 2018), in old cells we found  
328 that the levels of transcripts synthesized from E-pro increased by >6-fold in either direction (Fig.  
329 6E–6H). Although transcript levels did not change in young cells after deletion of *SPT4*, they  
330 were >3-fold lower in old *spt4* $\Delta$  cells, compared to old wild-type cells (Fig. 6F, 6H). Thus, the  
331 function of Spt4 appears to become more important as cells age. We conclude that Spt4 is a  
332 strong candidate for an aging factor that restricts the lifespan of cells, in this case by elevated  
333 activation of non-coding RNA transcription as cells undergo more cell-divisions. This drives  
334 rDNA instability and senescence gets triggered.

335

## 336 **Discussion**

337           In the budding yeast, the rDNA locus is thought to be a source of a putative aging signal.  
338           Thus, the maintenance of rDNA stability is quite important for enhanced longevity. We identified  
339           that Spt4 is a key factor that accelerates rDNA instability and cellular senescence by enhancing  
340           transcription of non-coding RNA from E-pro (Fig. 1–4). The amount of Spt4 was increased in  
341           aging cells and its depletion extended the lifespan (Fig. 4, 6). By genetic analysis, Spt4 was  
342           demonstrated to function downstream of Fob1, Sir2, and E-pro activity in the regulation of rDNA  
343           stability and replicative lifespan (Fig. 2, 4, 5). These findings suggest that Spt4 works as an aging  
344           factor in budding yeast.

345           Our analysis of the *spt4* $\Delta$  mutant revealed that the activity of Spt4 stimulates  
346           transcription of non-coding RNA from E-pro and an upstream promoter in the IGS2,  
347           destabilizing the rDNA and extending replicative lifespan (Fig. 1–4). These Spt4-dependent  
348           phenotypes completely disappeared when cells lacked Sir2 and Fob1 (Fig. 2–4). When  
349           transcription from E-pro is repressed in the Gal-pro strain, Spt4 activity had no effect on rDNA  
350           stability or lifespan in this strain (Fig. 5). These results strongly suggest that the function of Spt4  
351           to activate transcription from E-pro is a direct cause of accelerating cellular senescence through  
352           rDNA instability.

353           Based on our findings and in view of the enzymatic activities of Sir2 and Spt4, we  
354           developed a working hypothesis how Spt4 enhances E-pro transcription in a Sir2 dependent  
355           manner (Fig. 7). Sir2 deacetylates the histones around E-pro in the wild-type strain (“+Sir2”)  
356           which results in compaction of the chromatin (Fritze et al., 1997; Huang and Moazed, 2003).  
357           The nucleosome can become a barrier to progression of RNAP II (Ehara and Sekine, 2018;



358 Kujirai and Kurumizaka, 2020). Thus, closed chromatin structures formed by Sir2 causes  
359 pausing of the RNAP II transcription machinery. The activity of the elongation factor Spt4-Spt5  
360 reduces this pause or releases this paused RNAP II, increasing the elongation rate of RNAP II at  
361 the usual rate (“+Spt4”). Production of non-coding RNA triggers rDNA instability (possibly by  
362 displacement of cohesin), which restricts the lifespan. In the absence of Spt4 (“-Spt4”),  
363 transcription elongation activity is reduced, resulting in a decrease of non-coding RNA synthesis  
364 that contributes to rDNA stability and a lifespan extension. In a *SIR2* defective background (“-  
365 Sir2”), the histones remain acetylated and transcription by RNAP II can proceed normally  
366 regardless of Spt4 activity (“±Spt4”) with elevated rDNA instability and a shortened lifespan as  
367 the outcome.

368 Sir2 is classified as an anti-aging factor, because its absence causes lifespan shortening,  
369 its over-production leads to extension of lifespan, and its protein level is reduced during normal  
370 aging (Kaeberlein *et al.*, 1999; Fine *et al.*, 2019). The activity of Spt4 seems to have an opposite  
371 effect on aging. Deletion of *SPT4* extended the lifespan by ~30% (Figs. 4, 5E, 5F), as previously  
372 reported (Smith *et al.*, 2008; McCormick *et al.*, 2015). Furthermore, we observed that as cells  
373 age, expression of Spt4 increased over 3-fold, which was accompanied with the significantly  
374 elevated levels of E-pro-derived transcripts of over 10-fold when cells age (Fig. 6). An increase  
375 in Spt4 levels, together with reduced Sir2 levels, may be instrumental in enhancing E-pro  
376 transcription by stimulating RNAP II processivity. However, a change of Sir2 distribution with  
377 an impact on lifespan has previously been described: Sir2 relocates to telomeres and the silent  
378 mating-type loci in the absence of Rif1, a mutation that affects lifespan (Salvi *et al.*, 2013).  
379 Therefore, it is also feasible that although Spt4 does not influence the Sir2 protein level (Fig. 3L,  
380 3M), it may be involved in Sir2 distribution in the genome. An increased abundance of Spt4 in

381 old cells may prevent localization of Sir2 to the IGS1. Then, non-coding RNA is transcribed  
382 from E-pro in more rDNA copies as cells age, compared to the situation in young cells, leading  
383 to enhanced transcript levels in old cells.

384 So far, experimental evidence is lacking that would explain how Spt4 protein level  
385 increases in aging cells. A possible mechanism is that Sir2 represses *SPT4* expression. If this is  
386 the case, Spt4 works downstream of Sir2 which fits the results of our genetic analysis on lifespan  
387 (Fig. 4), DSB formation and the regulation of expression and elongation of non-coding  
388 transcripts (Fig. 3), where Spt4 activity depended on that of Sir2. Whether 40% reduction in the  
389 levels of Sir2 we detected in aging cells would be sufficient to accomplish this, will have to be  
390 tested more specifically.

391 How do Spt4-dependent transcription activation in the rDNA IGSs induce cellular  
392 senescence? First, previous studies propose that the accumulation of ERCs induces cellular  
393 senescence by titrating factors that are important for transcription, genome maintenance, and cell  
394 growth (Sinclair and Guarente, 1997; Kwan et al., 2013; Neurohr et al., 2018). In line with this  
395 model, Spt4-mediated E-pro activation induces ERC formation, potentially driving cellular  
396 senescence (Fig. 1B–1D, 2E, 2F, 5C, 5D). The second model centers around the rDNA stability  
397 induced by DNA damage in the rDNA (Ganley *et al.*, 2009; Kobayashi, 2011; Ganley and  
398 Kobayashi, 2014). The Spt4 activity promotes DSB formation at arrested forks, although its  
399 impact on DSB end resection, an initiating event of rDNA copy number changes, could not be  
400 assessed in our study (Fig. 3D, 3E). The Spt4-mediated transcription activation of E-pro may  
401 promote homologous recombination-mediated rDNA instability by promoting DSB formation  
402 and its end resection, which needs to be clarified in future studies. Lastly, non-coding RNA  
403 transcription may drive cellular senescence in as yet unidentified manners. The lifespan of the

404 Gal-pro strain in glucose was markedly longer than that of the wild-type strain (38.9 to 22.1  
405 divisions, Figs. 5E, F), and even longer than that of the *fob1* mutant (26.5) that does not generate  
406 DSBs at the RFB site (Fig. 4). Furthermore, a noticeable upregulation of pre-rRNA synthesis had  
407 been observed as a concomitant of ERC accumulation preceding senescence (Morlot et al., 2019).  
408 Therefore, these observations suggest that noncoding transcription itself could be part of a  
409 pathway leading to senescence. The above models relating rDNA maintenance to aging do not  
410 need to be mutually exclusive, as might be revealed by further research into the molecular  
411 mechanisms controlling the events marked by DSB formation, the accumulation of ERCs and  
412 non-coding RNA and how these contribute to senescence.

413         Compared to wild type, the replicative lifespan of Gal-pro strains (including the Gal-pro  
414 *spt4* $\Delta$  mutant) was extended by ~ 80%, while the lifespan of the *spt4* $\Delta$  mutant with the native E-  
415 pro was increased by ~30% (Figs. 4, 5E, 5F). These differences indicate that transcription from  
416 E-pro is not the only factor that determines the onset of senescence via the rDNA. Other  
417 candidates than Spt4, which we count as an E-pro-mediated aging factor, have been identified  
418 (Fig. 1B). How the increase in rDNA stability observed in the absence of these putative aging  
419 factors, extends replicative lifespan will be analyzed in our future studies. The proteins encoded  
420 by *SIR2* and *SPT4* are conserved in mammalian cells. Therefore, the findings we reported here  
421 will be relevant for understanding the molecular mechanisms that link genomic instability in the  
422 rDNA to the initiation of senescence signals in human cells.

423

424 **AUTHOR CONTRIBUTIONS**

425 M.Y., M.S. and T.K. designed the experiments, analyzed the data and wrote the paper. M.Y.

426 performed the experiments.

427

428 **ACKNOWLEDGEMENTS**

429 We are grateful to David Schneider for yeast strains. This work was supported by JST CREST

430 (grant number JPMJCR19S3 to T.K.), JST FOREST Program (grant number JPMJFR214P to

431 M.S.), and Grant-in-Aid for Scientific Research (17H01443 and 21H04761 to T.K, and

432 20H05382 to M.S.).

433 **REFERENCES**

- 434 Anderson, S.J., Sikes, M.L., Zhang, Y., French, S.L., Salgia, S., Beyer, A.L., Nomura, M., and  
435 Schneider, D.A. (2011). The transcription elongation factor Spt5 influences transcription by RNA  
436 polymerase I positively and negatively. *J Biol Chem* 286, 18816-18824.  
437 10.1074/jbc.M110.202101.
- 438
- 439 Brewer, B.J., Lockshon, D., and Fangman, W.L. (1992). The arrest of replication forks in the  
440 rDNA of yeast occurs independently of transcription. *Cell* 71, 267-276. 10.1016/0092-  
441 8674(92)90355-g.
- 442
- 443 Buck, S.W., Maqani, N., Matecic, M., Hontz, R.D., Fine, R.D., Li, M., and Smith, J.S. (2016).  
444 RNA Polymerase I and Fob1 contributions to transcriptional silencing at the yeast rDNA locus.  
445 *Nucleic Acids Res* 44, 6173-6184. 10.1093/nar/gkw212.
- 446
- 447 Burkhalter, M.D., and Sogo, J.M. (2004). rDNA enhancer affects replication initiation and  
448 mitotic recombination: Fob1 mediates nucleolytic processing independently of replication.  
449 *Molecular cell* 15, 409-421. 10.1016/j.molcel.2004.06.024.
- 450
- 451 Decker, T.M. (2021). Mechanisms of Transcription Elongation Factor DSIF (Spt4-Spt5). *J Mol*  
452 *Biol* 433, 166657. 10.1016/j.jmb.2020.09.016.
- 453
- 454 Defosse, P.-A., Prusty, R., Kaeberlein, M., Lin, S.-J., Ferrigno, P., Silver, P.A., Keil, R.L., and  
455 Guarente, L. (1999). Elimination of Replication Block Protein Fob1 Extends the Life Span of  
456 Yeast Mother Cells. *Molecular cell* 3, 447-455. 10.1016/s1097-2765(00)80472-4.
- 457
- 458 Di Micco, R., Krizhanovsky, V., Baker, D., and d'Adda di Fagagna, F. (2021). Cellular  
459 senescence in ageing: from mechanisms to therapeutic opportunities. *Nat Rev Mol Cell Biol* 22,  
460 75-95. 10.1038/s41580-020-00314-w.
- 461
- 462 Ehara, H., and Sekine, S.I. (2018). Architecture of the RNA polymerase II elongation complex:  
463 new insights into Spt4/5 and Elf1. *Transcription* 9, 286-291. 10.1080/21541264.2018.1454817.
- 464
- 465 Fine, R.D., Maqani, N., Li, M., Franck, E., and Smith, J.S. (2019). Depletion of Limiting rDNA  
466 Structural Complexes Triggers Chromosomal Instability and Replicative Aging of  
467 *Saccharomyces cerevisiae*. *Genetics* 212, 75-91. 10.1534/genetics.119.302047.
- 468
- 469 Fritze, C.E., Verschueren, K., Strich, R., and Easton Esposito, R. (1997). Direct evidence for  
470 SIR2 modulation of chromatin structure in yeast rDNA. *EMBO J* 16, 6495-6509.  
471 10.1093/emboj/16.21.6495.
- 472
- 473 Ganley, A.R., Ide, S., Saka, K., and Kobayashi, T. (2009). The effect of replication initiation on  
474 gene amplification in the rDNA and its relationship to aging. *Molecular cell* 35, 683-693.  
475 10.1016/j.molcel.2009.07.012.
- 476
- 477 Ganley, A.R., and Kobayashi, T. (2014). Ribosomal DNA and cellular senescence: new evidence  
478 supporting the connection between rDNA and aging. *FEMS Yeast Res* 14, 49-59. 10.1111/1567-

479 1364.12133.

480

481 Goto, M., Sasaki, M., and Kobayashi, T. (2021). The S-Phase Cyclin Clb5 Promotes rRNA Gene  
482 (rDNA) Stability by Maintaining Replication Initiation Efficiency in rDNA. *Molecular and*  
483 *cellular biology* *41*. 10.1128/MCB.00324-20.

484

485 Guo, M., Xu, F., Yamada, J., Egelhofer, T., Gao, Y., Hartzog, G.A., Teng, M., and Niu, L. (2008).  
486 Core structure of the yeast spt4-spt5 complex: a conserved module for regulation of transcription  
487 elongation. *Structure* *16*, 1649-1658. 10.1016/j.str.2008.08.013.

488

489 Hartzog, G.A., and Fu, J. (2013). The Spt4-Spt5 complex: a multi-faceted regulator of  
490 transcription elongation. *Biochim Biophys Acta* *1829*, 105-115. 10.1016/j.bbagr.2012.08.007.

491

492 He, C., Zhou, C., and Kennedy, B.K. (2018). The yeast replicative aging model. *Biochim*  
493 *Biophys Acta Mol Basis Dis* *1864*, 2690-2696. 10.1016/j.bbadis.2018.02.023.

494

495 Huang, J., and Moazed, D. (2003). Association of the RENT complex with nontranscribed and  
496 coding regions of rDNA and a regional requirement for the replication fork block protein Fob1 in  
497 rDNA silencing. *Genes Dev* *17*, 2162-2176. 10.1101/gad.1108403.

498

499 Iida, T., and Kobayashi, T. (2019). RNA Polymerase I Activators Count and Adjust Ribosomal  
500 RNA Gene Copy Number. *Molecular cell* *73*, 645-654 e613. 10.1016/j.molcel.2018.11.029.

501

502 Kaeberlein, M., McVey, M., and Guarente, L. (1999). The SIR2/3/4 complex and SIR2 alone  
503 promote longevity in *Saccharomyces cerevisiae* by two different mechanisms. *Genes Dev* *13*,  
504 2570-2580. 10.1101/gad.13.19.2570.

505

506 Kennedy, B.K., Austriaco, N.R., Jr., and Guarente, L. (1994). Daughter cells of *Saccharomyces*  
507 *cerevisiae* from old mothers display a reduced life span. *J Cell Biol* *127*, 1985-1993.  
508 10.1083/jcb.127.6.1985.

509

510 Kobayashi, T. (2011). Regulation of ribosomal RNA gene copy number and its role in  
511 modulating genome integrity and evolutionary adaptability in yeast. *Cellular and molecular life*  
512 *sciences : CMLS* *68*, 1395-1403. 10.1007/s00018-010-0613-2.

513

514 Kobayashi, T., and Ganley, A.R. (2005). Recombination regulation by transcription-induced  
515 cohesin dissociation in rDNA repeats. *Science* *309*, 1581-1584. 10.1126/science.1116102.

516

517 Kobayashi, T., Heck, D.J., Nomura, M., and Horiuchi, T. (1998). Expansion and contraction of  
518 ribosomal DNA repeats in *Saccharomyces cerevisiae*: requirement of replication fork blocking  
519 (Fob1) protein and the role of RNA polymerase I. *Genes & Development* *12*, 3821-3830.  
520 10.1101/gad.12.24.3821.

521

522 Kobayashi, T., Hidaka, M., Nishizawa, M., and Horiuchi, T. (1992). Identification of a site  
523 required for DNA replication fork blocking activity in the rRNA gene cluster in *Saccharomyces*  
524 *cerevisiae*. *Mol Gen Genet* *233*, 355-362.

- 525  
526 Kobayashi, T., and Horiuchi, T. (1996). A yeast gene product, Fob1 protein, required for both  
527 replication fork blocking and recombinational hotspot activities. *Genes to cells : devoted to*  
528 *molecular & cellular mechanisms 1*, 465-474.
- 529  
530 Kobayashi, T., Horiuchi, T., Tongaonkar, P., Vu, L., and Nomura, M. (2004). SIR2 regulates  
531 recombination between different rDNA repeats, but not recombination within individual rRNA  
532 genes in yeast. *Cell 117*, 441-453.
- 533  
534 Kujirai, T., and Kurumizaka, H. (2020). Transcription through the nucleosome. *Curr Opin Struct*  
535 *Biol 61*, 42-49. [10.1016/j.sbi.2019.10.007](https://doi.org/10.1016/j.sbi.2019.10.007).
- 536  
537 Kwan, E.X., Foss, E.J., Tsuchiyama, S., Alvino, G.M., Kruglyak, L., Kaeberlein, M.,  
538 Raghuraman, M.K., Brewer, B.J., Kennedy, B.K., and Bedalov, A. (2013). A natural  
539 polymorphism in rDNA replication origins links origin activation with calorie restriction and  
540 lifespan. *PLoS Genet 9*, e1003329. [10.1371/journal.pgen.1003329](https://doi.org/10.1371/journal.pgen.1003329).
- 541  
542 Kwan, E.X., Wang, X.S., Amemiya, H.M., Brewer, B.J., and Raghuraman, M.K. (2016). rDNA  
543 Copy Number Variants Are Frequent Passenger Mutations in *Saccharomyces cerevisiae* Deletion  
544 Collections and de Novo Transformants. *G3 (Bethesda) 6*, 2829-2838. [10.1534/g3.116.030296](https://doi.org/10.1534/g3.116.030296).
- 545  
546 Lepore, N., and Lafontaine, D.L. (2011). A functional interface at the rDNA connects rRNA  
547 synthesis, pre-rRNA processing and nucleolar surveillance in budding yeast. *PLoS One 6*,  
548 e24962. [10.1371/journal.pone.0024962](https://doi.org/10.1371/journal.pone.0024962).
- 549  
550 Longo, V.D., Shadel, G.S., Kaeberlein, M., and Kennedy, B. (2012). Replicative and  
551 chronological aging in *Saccharomyces cerevisiae*. *Cell Metab 16*, 18-31.  
552 [10.1016/j.cmet.2012.06.002](https://doi.org/10.1016/j.cmet.2012.06.002).
- 553  
554 López-Otín, C., Blasco, M.A., Partridge, L., Serrano, M., and Kroemer, G. (2013). The  
555 Hallmarks of Aging. *Cell 153*, 1194-1217. [10.1016/j.cell.2013.05.039](https://doi.org/10.1016/j.cell.2013.05.039).
- 556  
557 McCormick, M.A., Delaney, J.R., Tsuchiya, M., Tsuchiyama, S., Shemorry, A., Sim, S., Chou,  
558 A.C., Ahmed, U., Carr, D., Murakami, C.J., et al. (2015). A Comprehensive Analysis of  
559 Replicative Lifespan in 4,698 Single-Gene Deletion Strains Uncovers Conserved Mechanisms of  
560 Aging. *Cell Metab 22*, 895-906. [10.1016/j.cmet.2015.09.008](https://doi.org/10.1016/j.cmet.2015.09.008).
- 561  
562 McHugh, D., and Gil, J. (2018). Senescence and aging: Causes, consequences, and therapeutic  
563 avenues. *J Cell Biol 217*, 65-77. [10.1083/jcb.201708092](https://doi.org/10.1083/jcb.201708092).
- 564  
565 Morlot, S., Song, J., Leger-Silvestre, I., Matifas, A., Gadal, O., and Charvin, G. (2019).  
566 Excessive rDNA Transcription Drives the Disruption in Nuclear Homeostasis during Entry into  
567 Senescence in Budding Yeast. *Cell Rep 28*, 408-422 e404. [10.1016/j.celrep.2019.06.032](https://doi.org/10.1016/j.celrep.2019.06.032).
- 568  
569 Neurohr, G.E., Terry, R.L., Sandikci, A., Zou, K., Li, H., and Amon, A. (2018). Deregulation of  
570 the G1/S-phase transition is the proximal cause of mortality in old yeast mother cells. *Genes Dev*

- 571 32, 1075-1084. [10.1101/gad.312140.118](https://doi.org/10.1101/gad.312140.118).
- 572
- 573 Pal, S., Postnikoff, S.D., Chavez, M., and Tyler, J.K. (2018). Impaired cohesion and homologous  
574 recombination during replicative aging in budding yeast. *Sci Adv* 4, eaaq0236.  
575 [10.1126/sciadv.aaq0236](https://doi.org/10.1126/sciadv.aaq0236).
- 576
- 577 Saka, K., Ide, S., Ganley, A.R., and Kobayashi, T. (2013). Cellular senescence in yeast is  
578 regulated by rDNA noncoding transcription. *Curr Biol* 23, 1794-1798.  
579 [10.1016/j.cub.2013.07.048](https://doi.org/10.1016/j.cub.2013.07.048).
- 580
- 581 Salvi, J.S., Chan, J.N., Pettigrew, C., Liu, T.T., Wu, J.D., and Mekhail, K. (2013). Enforcement  
582 of a lifespan-sustaining distribution of Sir2 between telomeres, mating-type loci, and rDNA  
583 repeats by Rif1. *Aging Cell* 12, 67-75. [10.1111/ace1.12020](https://doi.org/10.1111/ace1.12020).
- 584
- 585 Sasaki, M., and Kobayashi, T. (2017). Ctf4 Prevents Genome Rearrangements by Suppressing  
586 DNA Double-Strand Break Formation and Its End Resection at Arrested Replication Forks.  
587 *Molecular cell* 66, 533-545 e535. [10.1016/j.molcel.2017.04.020](https://doi.org/10.1016/j.molcel.2017.04.020).
- 588
- 589 Sasaki, M., and Kobayashi, T. (2021). Gel Electrophoresis Analysis of rDNA Instability in  
590 *Saccharomyces cerevisiae*. *Methods Mol Biol* 2153, 403-425. [10.1007/978-1-0716-0644-5\\_28](https://doi.org/10.1007/978-1-0716-0644-5_28).
- 591
- 592 Schneider, D.A., French, S.L., Osheim, Y.N., Bailey, A.O., Vu, L., Dodd, J., Yates, J.R., Beyer,  
593 A.L., and Nomura, M. (2006). RNA polymerase II elongation factors Spt4p and Spt5p play roles  
594 in transcription elongation by RNA polymerase I and rRNA processing. *Proc Natl Acad Sci U S*  
595 *A* 103, 12707-12712. [10.1073/pnas.0605686103](https://doi.org/10.1073/pnas.0605686103).
- 596
- 597 Sinclair, D., Mills, K., and Guarente, L. (1998a). Aging in *Saccharomyces cerevisiae*. *Annu Rev*  
598 *Microbiol* 52, 533-560. [10.1146/annurev.micro.52.1.533](https://doi.org/10.1146/annurev.micro.52.1.533).
- 599
- 600 Sinclair, D.A., and Guarente, L. (1997). Extrachromosomal rDNA Circles— A Cause of Aging in  
601 Yeast. *Cell* 91, 1033-1042. [10.1016/s0092-8674\(00\)80493-6](https://doi.org/10.1016/s0092-8674(00)80493-6).
- 602
- 603 Sinclair, D.A., Mills, K., and Guarente, L. (1998b). Molecular mechanisms of yeast aging.  
604 *Trends in Biochemical Sciences* 23, 131-134. [10.1016/s0968-0004\(98\)01188-8](https://doi.org/10.1016/s0968-0004(98)01188-8).
- 605
- 606 Smith, E.D., Tsuchiya, M., Fox, L.A., Dang, N., Hu, D., Kerr, E.O., Johnston, E.D., Tchao, B.N.,  
607 Pak, D.N., Welton, K.L., et al. (2008). Quantitative evidence for conserved longevity pathways  
608 between divergent eukaryotic species. *Genome Res* 18, 564-570. [10.1101/gr.074724.107](https://doi.org/10.1101/gr.074724.107).
- 609
- 610 Takeuchi, Y., Horiuchi, T., and Kobayashi, T. (2003). Transcription-dependent recombination and  
611 the role of fork collision in yeast rDNA. *Genes Dev* 17, 1497-1506. [10.1101/gad.1085403](https://doi.org/10.1101/gad.1085403).
- 612
- 613 Viktorovskaya, O.V., Appling, F.D., and Schneider, D.A. (2011). Yeast transcription elongation  
614 factor Spt5 associates with RNA polymerase I and RNA polymerase II directly. *J Biol Chem* 286,  
615 18825-18833. [10.1074/jbc.M110.202119](https://doi.org/10.1074/jbc.M110.202119).
- 616



617 Weitao, T., Budd, M., Hoopes, L.L., and Campbell, J.L. (2003). Dna2 helicase/nuclease causes  
618 replicative fork stalling and double-strand breaks in the ribosomal DNA of *Saccharomyces*  
619 *cerevisiae*. *The Journal of biological chemistry* 278, 22513-22522. 10.1074/jbc.M301610200.  
620  
621

622 **FIGURE LEGENDS**

623 **Figure 1. The Spt4-Spt5 complex enhances rDNA instability by promoting ERC production.**

624 (A) DNA replication fork arrest, DSB formation and copy number changes in the budding yeast  
625 rDNA region. 35S, 35S precursor rRNA coding region; 5S, 5S rRNA coding region; rARS,  
626 autonomously replicating sequence in rDNA; RFB, replication fork barrier; DSB, DNA double-  
627 strand break; ERC, extrachromosomal rDNA circle. The black bar indicates the position of probe  
628 1 used for ERC detection by Southern blotting.

629 (B) The summary of the ERC analyses. See Figure S1 for the raw data. The level of ERCs for the  
630 indicated strains was determined by calculating the ratio of ERCs relative to genomic rDNA and  
631 normalized to the average level of ERCs in wild-type clones (WT; bar shows mean  $\pm$  s.e.m; bars  
632 for mutant strains show the range between the ERC-levels for two independent clones). One-way  
633 ANOVA was performed for multiple comparisons (asterisks indicate statistically significant  
634 difference between wild type and mutants [ $p < 0.05$ ]).

635 (C) ERC detection. DNA was isolated from three independent clones of the indicated strains and  
636 separated by agarose gel electrophoresis, followed by Southern blotting with probe 1 shown in  
637 (A). Genomic rDNA, supercoiled and relaxed forms of monomeric and dimeric ERCs are  
638 indicated. Sizes of lambda DNA-*Hind* III markers are indicated.

639 (D) Quantitation of ERC levels. ERCs in (C) were quantified, as described in (B). Bars show  
640 mean  $\pm$  s.e.m. One-way ANOVA was performed for multiple comparisons (asterisks indicate  
641 statistically significant difference between wild type and mutants [ $p < 0.05$ ]; ns indicates no  
642 significant difference ( $p > 0.05$ )).

643

644 **Figure 2. Spt4-mediated enhancement of rDNA instability requires SIR2.**

645 **(A, D)** Size heterogeneity of chromosome XII. DNA was extracted from four (A) and three (D)  
646 independent clones of the indicated strains and separated by PFGE. DNA was stained with  
647 ethidium bromide (EtBr). The extent of variability in rDNA copy number determines the  
648 appearance of the chr XII band; stable rDNA migrates together, while a diffused appearance of  
649 the band (from little to extreme smearing) reflects (small to large) differences in rDNA copy  
650 number in cell population. In (A), four independent clones of the *sir2Δ spt4Δ* mutant were  
651 marked by either 'small' or 'normal', depending on the size of chr XII. M indicates *Hansenula*  
652 *wingei* chromosomal DNA markers.

653 **(B)** Overproduction of Fob1 protein. Fob1, C-terminally tagged with a triple HA epitope (Fob1-  
654 3HA), was detected in protein extracts prepared from three independent clones of the indicated  
655 strains that carry the *FOBI* ORF under control of either its endogenous promoter (*FOBI-3HA*) or  
656 the constitutive *ADHI* promoter (*ADHIp-FOBI-3HA*). Proteins were separated by SDS-PAGE,  
657 followed by Western blotting with antibodies against the HA tag and tubulin.

658 **(C)** Quantitation of Fob1 protein levels. The levels of Fob1-3HA in (B) were quantified relative  
659 to tubulin, which was normalized to the average of *FOBI-3HA* clones (bars show mean  $\pm$  s.e.m).

660 **(E)** ERC detection. DNA isolated from the indicated strains was separated by agarose gel  
661 electrophoresis, followed by Southern blotting with probe 1 (shown in Figs. 1A and 3A).  
662 Genomic rDNA, supercoiled and relaxed forms of monomeric and dimeric ERCs are indicated.  
663 Sizes of lambda DNA-Hind III markers are shown.

664 **(F)** Quantitation of ERC levels. Levels of ERCs in (E) were determined for the indicated strains  
665 as the ratio of the sum of monomeric and dimeric ERCs relative to genomic rDNA (top panel),  
666 which was normalized to the average of wild-type clones (bars show mean  $\pm$  s.e.m). Statistical

667 analyses were performed between wild type and *spt4* $\Delta$  and between *sir2* $\Delta$  and *sir2* $\Delta$  *spt4* $\Delta$ , by  
668 two-sided Welch t test. A significant difference ( $p < 0.05$ ) is marked by an asterisk; ns indicates  
669 no significant difference ( $p > 0.05$ ).

670

671 **Figure 3. Spt4 stimulates transcription of non-coding RNA from E-pro.**

672 **(A)** Restriction map and the positions of the probes used in this study. *N* and *Bg* indicate  
673 restriction sites recognized by *Nhe* I and *Bgl* II, respectively. The 35S (green) and 5S (gray)  
674 rRNA genes (arrow bars), the origin of replication within the rDNA (rARS) and the regulatory,  
675 bidirectional promoter E-pro are shown. Positions of probes used for 2D (Probe 1) and DSB  
676 (probe 2) analyses in (B) and (D) are indicated, as well as the position of single-stranded probes  
677 used for detection of non-coding RNA transcribed from E-pro in the direction toward the RFB  
678 site (Probe 3) or the 5S gene (Probe 4).

679 **(B)** 2D agarose gel electrophoresis. Genomic DNA isolated from the indicated strains was  
680 digested with *Nhe* I. DNA was separated by size in the first dimension and by size and shape in  
681 the second dimension, followed by Southern blotting with probe 1, as indicated in (A). The  
682 diagram on the left shows the expected migration pattern of different replication intermediates.  
683 1N represents the bulk of unreplicated, linear DNA.

684 **(C)** Quantitation of fork arrest. The signals of arrested forks in (B) were quantified relative to the  
685 total of replication-intermediate signals (that included bubble arcs, Y arcs, arrested forks, and  
686 double Y spots). The levels of arrested forks in the *spt4* $\Delta$  mutant was normalized to the average  
687 of wild-type clones.

688 **(D)** DSB assay. Genomic DNA isolated from the indicated strains was digested with *Bgl* II. DNA  
689 was separated by single-dimension agarose gel electrophoresis, followed by Southern blotting

690 with probe 2 indicated in (A). Intermediates are indicated incl. terminal fragments containing the  
691 telomere-proximal rDNA repeat (open circle) and non-specific background (asterisks). In the  
692 absence of Fob1 (*fob1Δ*), intermediates with replication forks that just entered the 35S rRNA  
693 region are prevalent.

694 **(E)** Quantitation of DSBs. The DSB frequency was determined by quantifying the signal of  
695 DSBs in (D) relative to that of arrested forks, which was normalized to the average of wild-type  
696 clones (bars show mean  $\pm$  s.e.m). One-way ANOVA was performed for multiple comparisons.  
697 An asterisk indicates a significant difference ( $p < 0.05$ ); ns marks a difference that is not  
698 statistically significant ( $p > 0.05$ ).

699 **(F, H, J)** Detection of non-coding RNAs transcribed from E-pro. RNA isolated from the  
700 indicated strains was separated by gel electrophoresis in formaldehyde-containing agarose gel,  
701 followed by Northern blotting. IGS1-F transcribed from E-pro toward 5S rDNA was detected  
702 with probe 4 (F, J). RNA transcribed toward the RFB from E-pro (IGS1-R) or from an upstream  
703 promoter (IGS2-R) were detected with probe 3 (H). Membranes were reprobed for *ACT1*  
704 transcripts as a control for loading (ACT1).

705 **(G, I, K)** Quantitation of non-coding RNA. Signals corresponding to IGS1-F (G, K) and IGS2-R  
706 transcripts (I) were quantified relative to ACT1, which was normalized to the average of wild-  
707 type clones. Bars show mean  $\pm$  s.e.m. in (G) and (I) and mean and the range from two  
708 independent experiments in (K). Signals of IGS1-R transcripts were detected below detection  
709 limit and were thus not quantified. One-way ANOVA was performed for multiple comparisons in  
710 (G) and (I). An asterisk indicates a significant difference ( $p < 0.05$ ); ns marks a difference that is  
711 not statistically significant ( $p > 0.05$ ).

712 **(L)** Detection of Sir2 that is C-terminally tagged with a triple HA epitope (Sir2-3HA). Protein

713 extracts isolated from four independent clones of the indicated strains were separated by SDS-  
714 PAGE, followed by Western blotting with antibodies against HA tag and tubulin.  
715 **(M)** Quantitation of Sir2 protein levels. The level of Sir2-3HA protein was quantified relative to  
716 tubulin, which was normalized to the average of wild-type clones (bars show the range from two  
717 independent experiments).

718

719 **Figure 4. Spt4-mediated shortening of replicative lifespan depends on *FOB1* and *SIR2*.**

720 **(A, B)** Lifespans were determined by counting the number of daughter cells produced by a  
721 mother cell. Survival curve (A) and the mean lifespans (B) of the indicated strains were  
722 determined. The numbers of cells analyzed for lifespan measurements were n=101 (WT), 107  
723 (*spt4*Δ), 33 (*sir2*Δ), 31 (*spt4*Δ *sir2*Δ), 24 (*fob1*Δ), 27 (*spt4*Δ *fob1*Δ), 26 (*ADH1p-FOB1*), and 26  
724 (*ADH1p-FOB1 spt4*Δ). Statistical significance was determined by a Kruskal-Wallis non-  
725 parametric test with Dunn's multiple comparisons tests. An asterisk indicates a significant  
726 difference ( $p < 0.001$ ); ns marks a difference that is not statistically significant. ns (\*) between  
727 *ADH1p-FOB1* and *ADH1p-FOB1 spt4*Δ strains indicates that the difference in the mean lifespan  
728 between *ADH1p-FOB1* and *ADH1p-FOB1 spt4*Δ strains is not statistically significant by a  
729 Kruskal-Wallis non-parametric test with Dunn's multiple comparisons tests but was found to be  
730 significant by the Mann-Whitney, nonparametric test ( $P < 0.001$ ).

731

732 **Figure 5. Spt4-mediated rDNA instability and shortening of replicative lifespan depends on**  
733 **transcription activity from E-pro.**

734 **(A)** Replacement of the E-pro with the bi-directional *GALI/10* promoter in all the rDNA copies  
735 in the Gal-pro strain. Probes 3 indicates the position of the single-stranded probe used for

736 detection of non-coding RNA in (B).

737 **(B)** Detection of non-coding RNAs transcribed from E-pro and Gal-pro. The indicated strains  
738 were cultured in media with glucose, except for control cells that were grown in the presence of  
739 galactose (+gal). RNA was isolated and separated in formaldehyde-containing agarose, followed  
740 by Northern blotting. Transcripts synthesized toward the RFB site were detected with probe 3  
741 (see (A)). Membranes were reprobbed with a probe hybridizing to *ACT1* transcripts (ACT1).

742 **(C)** ERC detection. DNA isolated from the indicated strains grown in glucose-containing media  
743 was separated by agarose gel electrophoresis, followed by Southern blotting with probe 1 (see  
744 Figs. 1A, 3A). Genomic rDNA and supercoiled and dimer forms of monomeric and dimeric  
745 ERCs are indicated. Sizes of lambda DNA-Hind III markers are indicated.

746 **(D)** Quantitation of ERC levels. Levels of ERCs in (C) were determined by the ratio of the sum  
747 of monomeric and dimeric ERCs relative to genomic rDNA, which was normalized to the  
748 average of wild-type clones (bars show mean  $\pm$  s.e.m). One-way ANOVA was performed for  
749 multiple comparisons (asterisks indicate statistically significant difference between wild type and  
750 mutants [ $p < 0.05$ ]; ns indicates no significant difference ( $p > 0.05$ )).

751 **(E, F)** Lifespans were determined by counting the number of daughter cells produced by mother  
752 cells growing on medium with glucose. Survival curve (E) and the mean life spans (F) of the  
753 indicated strains are shown. The numbers of cells analyzed for lifespan measurements were n=28  
754 (E-pro), 29 (E-pro *spt4Δ*), 26 (Gal-pro), and 28 (Gal-pro *spt4Δ*). Statistical significance was  
755 determined by a Kruskal-Wallis non-parametric test with Dunn's multiple comparisons tests. An  
756 asterisk indicates a significant difference ( $p < 0.05$ ); ns marks a difference that is not statistically  
757 significant ( $p > 0.05$ ).

758

759 **Figure 6. The function of Spt4 becomes more important as cells age.**

760 **(A, C)** Detection of Sir2 and Spt4 protein levels. Strains were constructed expressing Sir2 or  
761 Spt4 protein with a triple HA epitope at the C-terminus. Protein extracts isolated from three  
762 independent clones of the indicated strains were separated by SDS-PAGE, followed by Western  
763 blotting with antibodies against HA to detect Sir2-3HA (A) or Spt4-3HA (C), and against tubulin.

764 **(B, D)** Quantitation of Sir2 and Spt4 expression. The level of Sir2-3HA (B) and Spt4-3HA (D)  
765 protein was quantified relative to tubulin, which was normalized to the average of their levels in  
766 young cells (bars show mean  $\pm$  s.e.m).

767 **(E, G)** Synthesis of non-coding RNA in young and old cells. In each of the three independent  
768 cultures, young cells were split from old cells for the indicated strains. The control *sir2* $\Delta$  cells  
769 were collected from one exponentially growing culture. RNA was isolated and separated by gel  
770 electrophoresis over formaldehyde-containing agarose, followed by Northern blotting.

771 Transcripts synthesized toward the 5S (IGS1-F) and RFB sides (IGS2-R) were detected with  
772 probes 4 and 3 (see Fig. 3A), respectively. Membranes were reprobbed with the *ACT1* probe.  
773 RNA from the *sir2* $\Delta$  strain was isolated from unsorted young cells.

774 **(F, H)** Quantitation of non-coding RNA levels. The signals of non-coding RNA transcripts (E, G)  
775 were quantified relative to *ACT1*, which was normalized to the average of wild-type clones (bars  
776 show mean  $\pm$  s.e.m). One-way ANOVA was performed for multiple comparisons for samples,  
777 except for *sir2* $\Delta$  (asterisks indicate statistically significant difference between wild type and  
778 mutants [ $p < 0.05$ ]; ns indicates no significant difference ( $p > 0.05$ )).

779



780 **Figure 7. Spt4 promotes transcription of non-coding RNA from E-pro in a manner**  
781 **dependent on Sir2.**

782 In wild-type cells (+Sir2, +Spt4), due to the histone deacetylase activity of Sir2, histones lose  
783 their acetyl modifications (Ac) and closed chromatin structures are formed around E-pro. Such  
784 chromatin structures block progression of RNA polymerase II (RNAP II). The Spt4-Spt5  
785 complex is a transcription elongation factor that facilitates progression of RNAP II, leading to  
786 transcription of non-coding RNA at a normal rate when histones are deacetylated. Thus, in cells  
787 carrying Sir2 but not Spt4 (or defective Spt5) (+Sir2, -Spt4), RNAP II cannot progress normally  
788 and non-coding RNAs are transcribed at a reduced rate, which leads to an increase in rDNA  
789 stability, generating less aging signal and slows down cellular senescence. In the absence of Sir2,  
790 chromatin structures are kept open, stimulating transcription of non-coding RNA by RNAP II,  
791 regardless of the presence or absence of Spt4-Spt5 activity (+Sir2,  $\pm$ Spt4). The increased  
792 transcription activity triggers rDNA instability, accelerating cellular senescence. As cells age, the  
793 protein level of Spt4 increases, elevating transcription from E-pro, rDNA instability and cellular  
794 senescence. In old cells lacking Spt4, the elongation activity is reduced and the transcription is  
795 decreased from E-pro (-Spt4), leading to rDNA stability and extension of lifespan.

## 796 **MATERIALS AND METHODS**

### 797 **Yeast Strains and Culture Methods**

798 Yeast strains used in this study are derivatives of W303 (*MATa ade2-1 ura3-1 his3-11, 15 trp1-1*  
799 *leu2-3,112 can1-100*). The *spt5-C292R* and *spt5-S324P, E427K* strains used in Fig. 1D were  
800 previously constructed and a kind gift from David Schneider (Anderson *et al.*, 2011). Gene  
801 tagging or deletion was performed by standard one-step gene replacement methods and the  
802 mutant strains were confirmed by PCR-based genotyping. Prior to use, strains were streaked  
803 from a glycerol stock onto YPD plates (1% w/v yeast extract, 2% w/v peptone, 2% w/v glucose,  
804 and 2% w/v agar). Yeast cells were grown at 30°C, except for the experiment in Fig. 1C where  
805 cells were grown at 27°C. For each DNA, RNA or protein preparation, 5 ml of YPD was  
806 inoculated with a single colony and incubated overnight. For PFGE and ERC analyses, overnight  
807 cultures were collected ( $5 \times 10^7$  cells/plug) and washed twice with 50 mM EDTA pH 7.5. For  
808 two-dimensional (2D) agarose gel electrophoresis and DSB analyses, overnight cultures were  
809 diluted into 50 mL of YPD medium to  $OD_{600} = 0.1$  and grown until  $OD_{600} = 0.4$ . The cultures  
810 were immediately treated with 1/1,000 vol of 10% sodium azide, collected ( $5 \times 10^7$  cells/plug)  
811 by centrifugation for 2 min at  $2,400 \times g$  at 4°C and washed twice with 50 mM EDTA pH 7.5. To  
812 prepare RNA, overnight cultures were diluted into 15 mL of YPDA medium (YPD containing 40  
813  $\mu\text{g/mL}$  adenine sulfate) to an  $OD_{600} = 0.1$  and collected when the cultures reached an  $OD_{600}$  of 0.8.  
814 Protein extracts were prepared from  $3 \times 10^7$  cells grown in 50 mL of YPD medium to  $OD_{600} =$   
815 0.4 after dilution of overnight cultures to  $OD_{600} = 0.1$ .

816

### 817 **Genomic DNA Preparation**

818 For PFGE, ERC, DSB, and 2D gel analyses, genomic DNA was prepared in low melting

819 temperature agarose plugs as described previously (Sasaki and Kobayashi, 2017; 2021). Briefly,  
820 collected cells were resuspended in 50 mM EDTA pH 7.5 (33  $\mu$ L cell per  $5 \times 10^7$  cells and  
821 incubated at 42°C. For each plug, 33  $\mu$ L cell suspension was mixed with 66  $\mu$ L solution 1 (0.83%  
822 low-melting-point agarose SeaPlaque GTG (Lonza), 170 mM sorbitol, 17 mM sodium citrate, 10  
823 mM EDTA pH 7.5, 0.85%  $\beta$ -mercaptoethanol, and 0.17 mg/mL Zymolyase 100 T (Nacalai)),  
824 poured into a plug mold (Bio-RAD) and placed at 4°C for the agarose to be solidified. Plugs  
825 were transferred to a 2 mL-tube containing solution 2 (450 mM EDTA pH 7.5, 10 mM Tris-HCl  
826 pH 7.5, 7.5%  $\beta$ -mercaptoethanol and 10  $\mu$ g/mL RNaseA (Macherey-Nagel)), and incubated for 1  
827 h at 37°C. Plugs were then incubated overnight at 50°C in solution 3 (250 mM EDTA pH 7.5, 10  
828 mM Tris-HCl pH 7.5, 1% sodium dodecyl sulfate (SDS) and 1 mg/mL Proteinase K (Nacalai)).  
829 Plugs were washed four times with 50 mM EDTA pH 7.5 and stored at 4°C in 50 mM EDTA pH  
830 7.5.

831

## 832 **Southern blotting**

### 833 *Agarose gel electrophoresis*

834 **ERC assay.** ERC assay was performed as described previously (Goto et al., 2021; Sasaki  
835 and Kobayashi, 2021). Half an agarose plug was placed on a tooth of the comb. After the comb  
836 was set in the gel tray (15  $\times$  25 cm), 300 ml of 0.4% agarose (SeaKem LE Agarose, Lonza) in 1x  
837 TAE (40 mM Tris base, 20 mM acetic acid, and 1 mM EDTA pH 8.0) was poured into the tray  
838 and allowed to set, after which 500 ng of lambda *Hind* III DNA marker was applied to an empty  
839 lane. The electrophoresis was run on a Sub-cell GT electrophoresis system (Bio-Rad) in 1.5 L of  
840 1x TAE at 1.0 V/cm for ~48 h at 4°C with buffer circulation. The buffer was changed every ~24  
841 h. DNA was stained with 0.5  $\mu$ g/mL EtBr for 30 min and then photographed.

842            **2D gel electrophoresis.** 2D gel electrophoresis was performed as described previously  
843 with slight modifications (Goto *et al.*, 2021). One-half of an agarose plug was placed in a 2-mL  
844 tube. The plug was equilibrated twice in 1 mL of 1x M buffer (TaKaRa) by rotating the tube for  
845 30 min at room temperature. After discarding the buffer, the plug was incubated in 160  $\mu$ L of 1x  
846 M buffer containing 160 units of *Nhe* I (TaKaRa) overnight at 37°C. The plug was placed on a  
847 tooth of the comb. The comb was set in the gel tray (15  $\times$  25 cm), 0.4 % agarose solution in 1x  
848 TBE was poured and the gel was allowed to solidify. 600 ng of lambda *Hind* III DNA markers  
849 were applied to the empty lane. The electrophoresis was performed on a Sub-cell GT  
850 electrophoresis system (Bio-Rad) in 1.5 L of 1x TBE at 1.32 V/cm for 14 h at room temperature  
851 with buffer circulation.

852            After electrophoresis completed, DNA was stained with 0.3  $\mu$ g/mL EtBr for 30 min and  
853 then photographed. Gel slices containing DNA ranging from 4.7 to 9.4 kb were excised, rotated  
854 90°, and placed onto the gel tray used for the second agarose gel electrophoresis for which 1.2 %  
855 agarose solution in 1x TBE containing 0.3  $\mu$ g/mL of EtBr was poured into the tray. The second-  
856 dimension electrophoresis was run on a Sub-cell GT electrophoresis system (Bio-Rad) in 1.5 L  
857 of 1x TBE containing 0.3  $\mu$ g/mL of EtBr at 6.0 V/cm for 6 h at 4°C with buffer circulation. After  
858 electrophoresis, the DNA was photographed.

859            **DSB assay.** The DSB assay was performed as described previously (Sasaki and  
860 Kobayashi, 2017; 2021). One-third of an agarose plug was cut and placed in a 2-mL tube. The  
861 plug was equilibrated four times in 1 mL of 1x TE (10 mM Tris base pH 7.5 and 1 mM EDTA  
862 pH 8.0) by rotating the tube for 15 min at room temperature. The plug was equilibrated twice in  
863 1 mL of 1x NEBuffer 3.1 (New England Biolabs) by rotating the tube for 30 min at room  
864 temperature. After discarding the buffer, the plug was incubated in 160  $\mu$ L of 1 $\times$  NEBuffer 3.1

865 buffer containing 160 units of *Bgl* II (New England Biolabs) overnight at 37°C. The plug was  
866 placed on a tooth of the comb which was set into the gel tray (15 × 25 cm), into which 0.7 %  
867 agarose solution in 1x TBE was poured; after setting of the gel 600 ng of lambda *Bst* E $\square$  DNA  
868 markers were applied to an empty lane. The electrophoresis was run on a Sub-cell GT  
869 electrophoresis system (Bio-Rad) in 1.5 L of 1x TBE at 2.0 V/cm for 22 h at room temperature  
870 with buffer circulation. After electrophoresis, the DNA was stained with 0.5  $\mu$ g/mL EtBr for 30  
871 min and then photographed.

### 872 *DNA transfer*

873 After agarose gel electrophoresis, the gel was incubated by gentle mixing in 500 mL of 0.25 N  
874 HCl for 30 min, 500 mL of denaturation solution (0.5 N NaOH, 1.5 M NaCl) for 30 min, and in  
875 500 mL of transfer buffer (0.25 N NaOH, 1.5 M NaCl) for 30 min. DNA was transferred to  
876 Hybond-XL (GE Healthcare) by the standard capillary transfer method with transfer buffer. DNA  
877 was fixed to the membrane by soaking the membrane in 300 mL freshly prepared 0.4 N NaOH  
878 for 10 min with gentle shaking, followed by rinsing the membrane with 2x SSC for 10 min. The  
879 membrane was dried and stored at 4°C.

### 880 *Probe preparation*

881 Probes were prepared as described previously (Sasaki and Kobayashi, 2017; 2021). Double-  
882 stranded DNA fragments were amplified by PCR. Probe 1 used for ERC and 2D analyses was  
883 amplified with the primers 5'-CATTTCCTATAGTTAACAGGACATGCC and 5'-  
884 AATTCGCACTATCCAGCTGCACTC; and probe 2 used for DSB analysis was amplified with  
885 the primers 5'-ACGAACGACAAGCCTACTCG and 5'-AAAAGGTGCGGAAATGGCTG. A  
886 portion of PCR products was gel-purified and seeded for a second round of PCR with the same  
887 primers. PCR products were gel-purified and 50 ng was used for random priming reactions in the

888 presence of radio-labeled nucleotide, [ $\alpha$ -<sup>32</sup>P]-dCTP (3,000 Ci/mmol, 10 mCi/ml, Perkin Elmer),  
889 using Random Primer DNA Labeling Kit (TaKaRa), according to the manufacturer's instructions.  
890 Unincorporated nucleotides were removed using ProbeQuant G-50 Micro Columns (GE  
891 Healthcare). The radio-labeled probes were heat-denatured for 5 min at 100°C, immediately prior  
892 to hybridization to the membrane.

### 893 ***Hybridization***

894 Southern hybridization was performed as described previously (Sasaki and Kobayashi, 2017;  
895 2021). The membrane was pre-wetted with 0.5 M phosphate buffer pH 7.2 and pre-hybridized  
896 for 1 h at 65°C with 25 mL of hybridization buffer (1% bovine serum albumin, 0.5 M phosphate  
897 buffer pH 7.2, 7% SDS, 1 mM EDTA pH 8.0). After buffer was discarded, the membrane was  
898 hybridized with 25 mL of hybridization buffer and heat-denatured probe overnight at 65°C. The  
899 membrane was washed four times for 15 min at 65°C with wash buffer (40 mM phosphate buffer  
900 pH 7.2, 1 % SDS, 1 mM EDTA pH 8.0) and exposed to a phosphor screen.

### 901 ***Image analysis***

902 Membranes were exposed to a phosphor screen for several days to achieve a high signal to noise  
903 ratio for DNA molecules that are low in abundance such as ERCs, replication intermediates in  
904 2D assays, and arrested forks and DSBs. The radioactive signal was detected using a Typhoon  
905 FLA 7000 (GE Healthcare). In ERC assays, genomic rDNA signal was used for normalization of  
906 ERC signals. Thus, the membranes were re-exposed to the phosphor screen for a short time  
907 before this signal reached saturation. ERC bands and genomic rDNA were quantified using  
908 FUJIFILM Multi Gauge version 2.0 software (Fujifilm) and scans from long and short exposures,  
909 respectively. The levels of ERCs were calculated by dividing the sum of signal intensities of  
910 ERCs with those of genomic rDNA. When the levels of ERCs were compared between samples

911 loaded on different gels, pieces of the plug excised from a specific DNA sample were loaded on  
912 different gels, blotted and hybridized. Signal of these plugs was used for normalization of  
913 samples on different gels. In 2D analyses, bubbles, Y arcs, RFB spots, and double Y spots were  
914 quantified using ImageJ (NIH). The RFB activity was calculated as the ratio between the signal  
915 for the spot with arrested forks and the sum of signals encompassing the total of DNA replication  
916 intermediates. Signals of DSBs and arrested forks were quantified using FUJIFILM Multi Gauge  
917 version 2.0 software (Fujifilm). The DSB frequency was calculated by normalizing the DSB  
918 signal to that of the arrested forks.

919

## 920 **PFGE**

921 PFGE was performed as described previously (Sasaki and Kobayashi, 2017; 2021) . Briefly, one-  
922 third of a plug was placed on a tooth of the comb, including a piece with *Hansenula wingei*  
923 chromosomal DNA markers (Bio-Rad). The comb was set into the gel tray, and 1.0% agarose  
924 solution was poured (Pulsed Field Certified Agarose, Bio-Rad) in 0.5x TBE (44.5 mM Tris base,  
925 44.5 mM boric acid and 1 mM EDTA pH 8.0). PFGE was run on a Bio-Rad CHEF DR-III  
926 system in 2.2 L of 0.5x TBE under the following conditions: 3.0 V/cm for 68 h at 14°C, 120°  
927 included angle, initial switch time of 300 s, and final switch time of 900 s. After electrophoresis,  
928 DNA was stained with 0.5 µg/mL ethidium bromide (EtBr) for 30 min, washed with dH<sub>2</sub>O for 30  
929 min, and then photographed.

930

## 931 **Preparation of protein extracts**

932 Protein extracts were prepared from yeast cells, as described previously with a slight  
933 modification (Iida and Kobayashi, 2019). Cells were re-suspended in 500 µL of ice-cold dH<sub>2</sub>O

934 and 75  $\mu$ L of Alkali-2ME solution (1.295N NaOH and 7.5% v/v 2-mercaptoethanol) by  
935 vortexing and incubated on ice for 10 min. Cell suspensions were mixed with 75  $\mu$ L of 50% w/v  
936 Trichloroacetic Acid by vortexing and incubated on ice for 10 min. After centrifugation at 10,000  
937  $\times g$  for 5 min at 4°C, the supernatant was completely removed and the pellets were resuspended  
938 in 50  $\mu$ L of buffer (800  $\mu$ l of 200 mM Tris-HCl pH 8.8 and 200 $\mu$ l of 5x SDS-loading buffer (250  
939 mM Tris-HCl, pH 6.8, 8% SDS, 0.1% bromophenol blue, 40% glycerol, 100 mM Dithiothreitol)).  
940 Protein concentration was quantified using a Bradford assay (Bio-Rad). Protein samples were  
941 stored at -20°C.

942

### 943 **Western blotting**

944 Protein samples were prepared by mixing 20–25  $\mu$ g of total protein extracts with 1x SDS-loading  
945 buffer to an end volume of 10  $\mu$ L. Protein samples were boiled for 5 min at 65°C, and  
946 centrifugated at 20,000  $\times g$  for 5 min at 4°C. Supernatants were loaded and separated on 7.5% or  
947 5–20% pre-made polyacrylamide gel (Atto) in 400 mL of 1x SDS-PAGE running buffer (25 mM  
948 Tris, 192 mM Glycine, 0.1% SDS). Proteins were transferred to Immobilon-P PVDF membrane  
949 (Merck-Millipore) in 1x transfer buffer (25 mM Tris, 192 mM glycine, 10% methanol) for 60  
950 min at 100 V at 4°C using a Mini Trans-Blot cell (Bio-Rad). After transfer, the membrane was  
951 blocked in 5% Skim Milk (Wako) in PBS-T (1x PBS, 0.05% Tween20) at room temperature for 1  
952 h. The membrane was incubated with HRP-conjugated antibodies overnight at 4°C: anti-3HA-  
953 HRP (F-7) (Santa Cruz [sc-7392], 1:5,000 in blocking buffer with 1% skim milk) and anti-  
954 tubulin-HRP (YL1/2) (BIO-RAD [MCA77P], 1/5000 dilution in blocking buffer with 5% Skim  
955 Milk Powder). After the membranes were washed three times for 5 min with PBS-T, the  
956 membranes were incubated with the chemiluminescent substrate, Immobilon Western



957 Chemiluminescent HRP Substrate (Merck-Millipore, WBKLS0100), according to the  
958 manufacturer's instruction. Protein signals were detected with a Fusion imaging system (Vilber  
959 Lourmat). Protein signals were quantified using ImageJ (NIH).

960

### 961 **Yeast RNA preparation**

962 RNA was prepared as described previously (Iida and Kobayashi, 2019), with a slight  
963 modification. Collected cells were resuspended in 400  $\mu$ L of TES (10 mM Tris-HCl pH 7.5, 10  
964 mM EDTA pH 7.5, 0.5% SDS) and 400  $\mu$ L of acidic phenol by vortexing for about 10 s. Cells  
965 were incubated at 65°C for 1 h with occasional vortexing every 15 min. Cell suspensions were  
966 incubated for 5 min on ice, and centrifuged at 20,000  $\times$  g for 10 min at 4°C. The aqueous phase  
967 was transferred to a new tube, and mixed with an equal volume of acidic phenol by vortexing for  
968 10 s. Samples were incubated for 5 min on ice and centrifuged at 20,000  $\times$  g for 10 min at 4°C.  
969 The aqueous phase was transferred to a new tube. Then, 1/10 vol. of 3M sodium acetate (pH 5.3)  
970 and 2.5 vol. of 100% ethanol were added and RNA was precipitated overnight at -20°C. After  
971 centrifugation at 20,000  $\times$  g for 10 min at 4°C, RNA was washed with 70% ethanol. RNA pellets  
972 were resuspended in 30  $\mu$ L of dH<sub>2</sub>O treated with 0.1% diethylpyrocarbonate (DEPC). The  
973 concentration of RNA was quantified using a NanoDrop ND-1000 spectrophotometer (Thermo  
974 Fisher Scientific). RNA samples were stored at -80°C.

975

### 976 **Northern blotting**

977 18~30  $\mu$ g of total RNA was brought up to 7  $\mu$ L with DEPC-treated dH<sub>2</sub>O and mixed with 17  $\mu$ L  
978 of RNA sample buffer (396  $\mu$ L deionized formamide, 120  $\mu$ L 10 x MOPS buffer [0.2 M MOPS,  
979 50 mM sodium acetate pH 5.2, 10 mM EDTA pH 7.5 in DEPC-treated dH<sub>2</sub>O], 162  $\mu$ L 37%

980 formaldehyde). Samples were heated at 65°C for 20 min, followed by a rapid chill on ice. 6 µL  
981 of 6x Gel Loading Dye (B7025S, New England Biolabs) and 1.5 µL of 2.5 mg/ml EtBr were  
982 added to each sample. The 1% agarose gel was made by dissolving 1 g of agarose powder in 73  
983 mL DEPC-treated dH<sub>2</sub>O and, after cooling to 60°C, addition of 17 mL 37% formaldehyde and 10  
984 mL 10x MOPS buffer. The solution was poured into a gel tray (13 × 12 cm) and allowed to set;  
985 10 µg of total RNA (10 µL) and 1.8 µg of DynaMarker RNA High markers were applied.  
986 Agarose gel electrophoresis on a Mupid EX system (Takara) was in 400 mL of 1x MOPS buffer  
987 at 20V for 20 min and then at 100V until the bromophenol blue dye migrated about 2/3 of the gel.  
988 After electrophoresis, the gel was photographed and RNA was transferred to Hybond-N+ (GE  
989 Healthcare) by standard capillary transfer.

990 Strand-specific probes were prepared from double-stranded DNA fragments, amplified by  
991 PCR and gel-purified. PCR primers for probe 3 (against IGS1-F) were 5'-  
992 AGGGAAATGGAGGGAAGAGA and 5'-TCTTGGCTTCCTATGCTAAATCC; for probe 4  
993 (against IGS1-R, IGS2-R), 5'-TCGCCAACCATTCCATATCT and 5'-  
994 CGATGAGGATGATAGTGTGTAAGA and for detecting ACT1, 5'-  
995 CGAATTGAGAGTTGCCCCAG and 5'-CAAGGACAAAACGGCTTGG. Strand-specific  
996 probes were then prepared by linear PCR in a final volume of 20 µL containing 0.2 mM dATP,  
997 0.2 mM dTTP, 0.2 mM dGTP, 50 µL [ $\alpha$ -<sup>32</sup>P]-dCTP (3,000 Ci/mmol, 10 mCi/ml, Perkin Elmer),  
998 1.25 u ExTaq (TaKaRa), 1x ExTaq buffer, 50 ng PCR product as a template, and 10 µM primer  
999 (5'-AGTTCCAGAGAGGCAGCGTA for probe 3, 5'-CATTATGCTCATTGGGTTGC for probe  
1000 4). PCR was initiated by a denaturation step at 94°C for 3 min, followed by 35 cycles of  
1001 amplification (96°C for 20 s, 51°C for 20 s, and 72°C for 30 s), and a final step at 72°C for 3 min.  
1002 Unincorporated nucleotides were removed using ProbeQuant G-50 Micro Columns (GE

1003 Healthcare). The radio-labeled probes were heat-denatured by incubating for 5 min at 100°C,  
1004 immediately prior to hybridization to the membrane.

1005         The membrane was incubated with 10 mL of ULTRAhyb Ultrasensitive Hybridization  
1006 Buffer (Thermo Fisher) at 42°C for 1 h. The heat-denatured probe was incubated with the  
1007 membrane overnight at 42°C. The membrane was rinsed twice with 2x SSC, washed for 15 min  
1008 at 42°C twice with wash buffer 1 (2x SSC, 0.1% SDS), and washed for 15 min at 42°C twice  
1009 with wash buffer 2 (0.1x SSC, 0.1% SDS). The membrane was exposed to phosphor screens for  
1010 several days and radioactive signals were detected using Typhoon FLA 7000 (GE Healthcare).  
1011 Probes were stripped by incubating the membrane with boiled 0.1% SDS by shaking for ~30 min,  
1012 rinsed with 2x SSC, and re-hybridized with the ACT1 probe that was prepared as described  
1013 above. Signals of IGS-F, IGS1-R, IGS2-R, and ACT1 were quantified using FUJIFILM Multi  
1014 Gauge version 2.0 software (Fujifilm). The levels of IGS-transcripts were normalized to the  
1015 ACT-1 signal.

1016

### 1017 **Replicative lifespan analysis**

1018 Replicative lifespan was measured as previously described (Kennedy et al., 1994). In brief,  
1019 strains were streaked out on a YPD plate at a low density and incubated at 30°C. Cells that  
1020 emerged as a small bud were placed to other areas of the plate using a Singer micromanipulator  
1021 system, and the plate was incubated at 30°C. When these cells produced buds, the budded  
1022 daughter cells were removed using a micromanipulator until the mother cell stopped producing  
1023 more buds. The number of budded daughter cells was counted and designated as the replicative  
1024 lifespan of each mother cell. Using replicative lifespan, the survival curve and average life span  
1025 were determined. Statistical significance was determined by t-test.

1026

1027 **Sorting of old cells**

1028 Old cells were sorted as described previously (Sinclair and Guarente, 1997) with modifications.

1029 A single colony was inoculated into 5 mL YPD and grown overnight at 30°C. The overnight

1030 YPD culture was diluted in 12 mL YPD to an  $OD_{600} = 0.2$  and grown to an  $OD_{600} = \sim 0.7-1.0$ .

1031 Then,  $5.0 \times 10^7$  cells were collected by centrifugation for 2 min at  $1,800 \times g$  at room temperature

1032 and washed twice in phosphate-buffered saline (PBS). The cells were resuspended in 200  $\mu$ L

1033 PBS and, after addition of 3.75 mg of sulfo-NHS-LC-biotin (Thermo Fisher Scientific) in 125  $\mu$ L

1034 of PBS, incubated at room temperature with gentle shaking for 15 min. Cells were collected,

1035 washed three times in 500  $\mu$ L PBS, resuspended in 1 ml YPD and split into 500  $\mu$ L cell

1036 suspensions that were used to inoculate two 1L flasks with 250 mL YPD medium. Cells were

1037 grown for 12 h at 30°C with shaking, allowing cells to divide  $\sim 8$  times. Before  $OD_{600}$  exceeded

1038 1.0, cells were collected by centrifugation and resuspended in cold PBS. 100  $\mu$ L of PBS-washed

1039 streptavidin-coated magnetic beads (PerSeptive Biosystems, MA) were added to the cells,

1040 followed by incubation at room temperature for 15 min with occasional swirling. Tubes were

1041 placed on a magnetic sorter for 5 min at 4°C. The supernatant containing cells unattached to the

1042 magnet, was transferred to a new tube and centrifuged. The cell pellet was stored as young cells.

1043 The cells attached to the magnet were eluted in cold PBS and washed five times. This cell pellet

1044 was stored as old cells. Bud scars were stained with Calcofluor (Sigma), visualized by

1045 fluorescent microscopy, and counted (50 cells per sample).

1046

1047 **Supplemental Information**

1048

1049 **Supplemental Figure legend**

1050 **Figure S1. ERC detection.**

1051 DNA isolated from the indicated mutant strains was separated by agarose gel electrophoresis,  
1052 followed by Southern blotting with probe 1 (see Fig. 1A). The quantified signal intensities are  
1053 shown in Fig. 1B. Genomic rDNA, supercoiled and relaxed forms of monomeric and dimeric  
1054 ERCs are indicated. Sizes of lambda DNA-Hind III markers are indicated.

1055

1056 **Supplementary Table 1. *Saccharomyces cerevisiae* strains used in this study**

1057

**Figure 1**

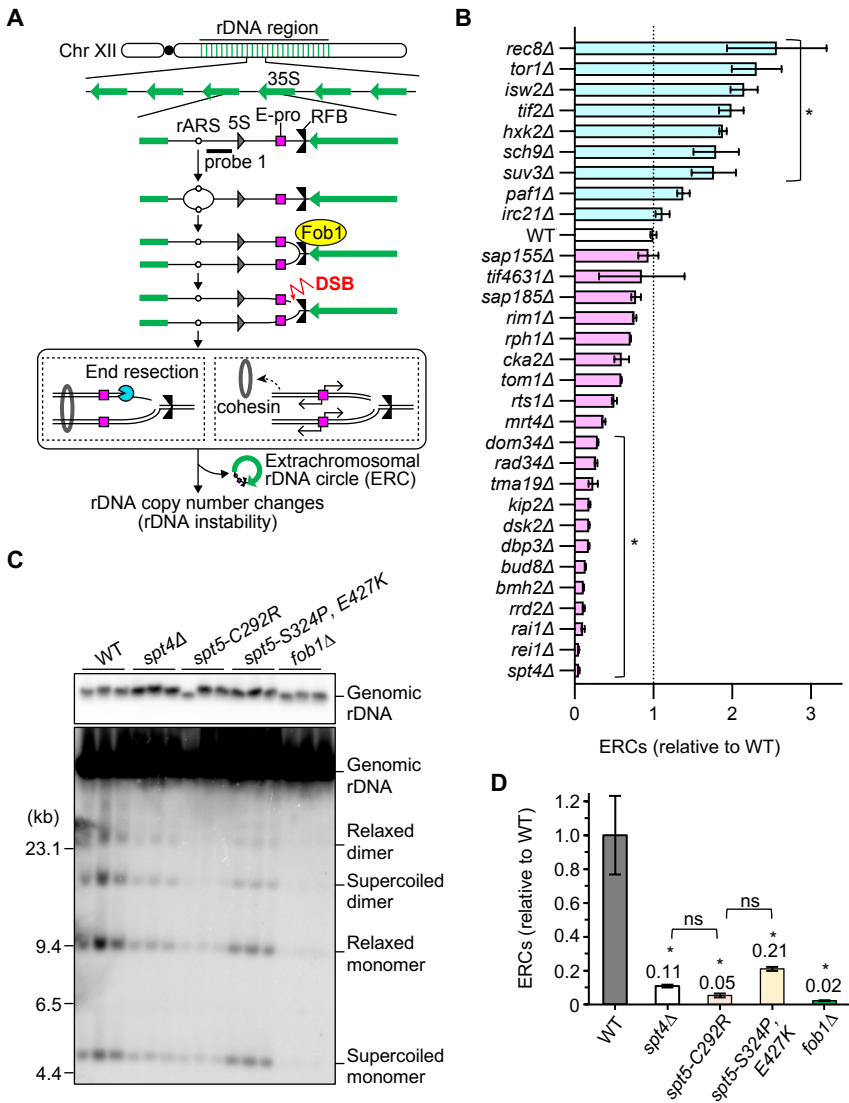

**Figure 2**

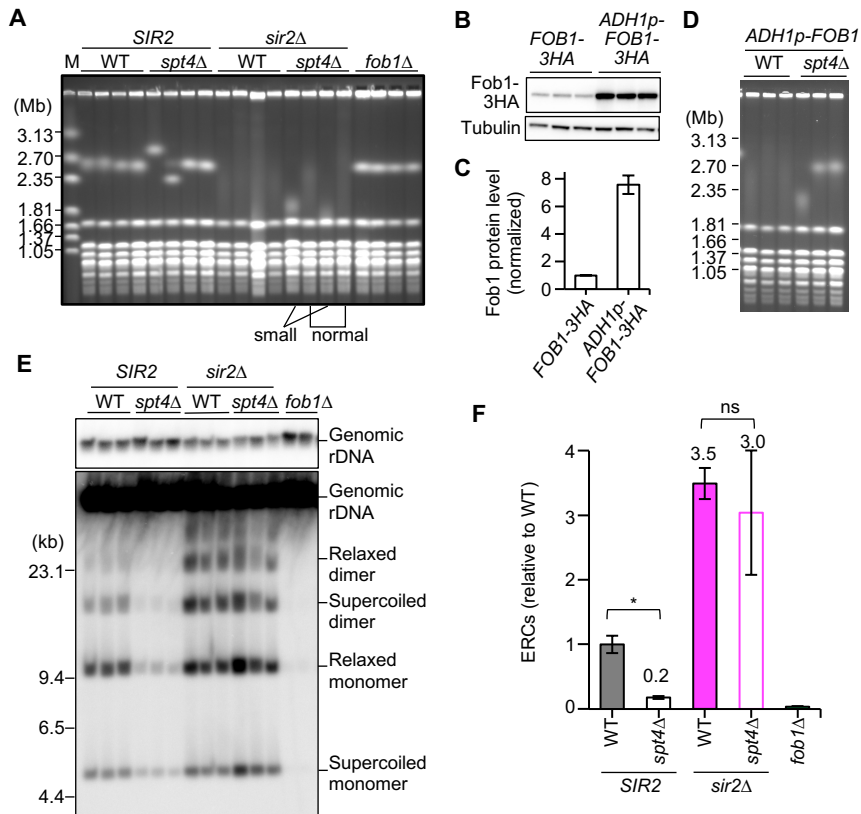

### Figure 3

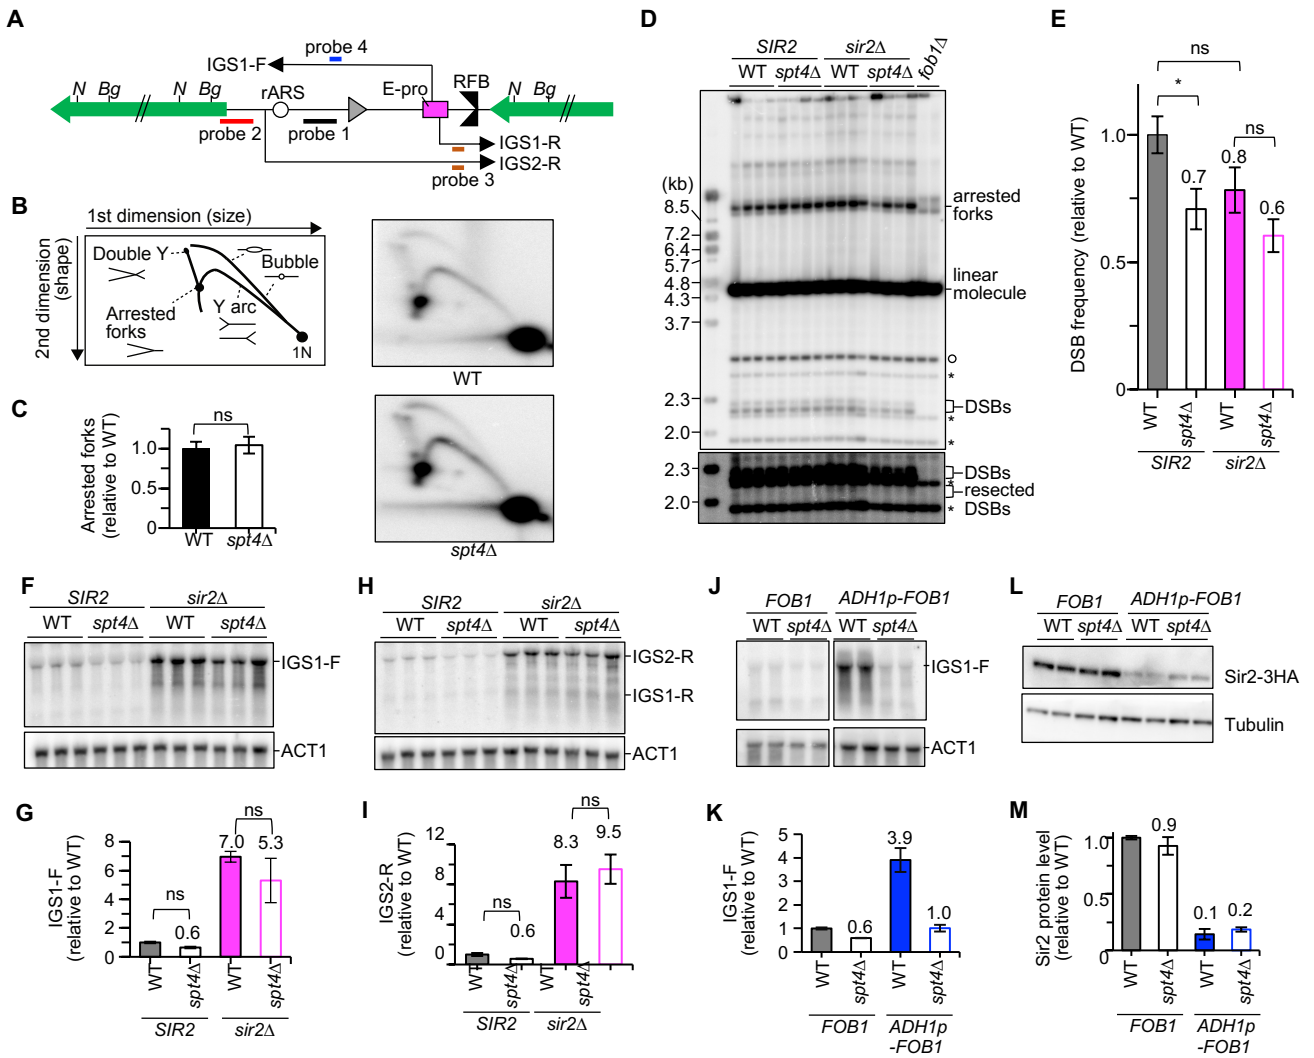



Figure 4

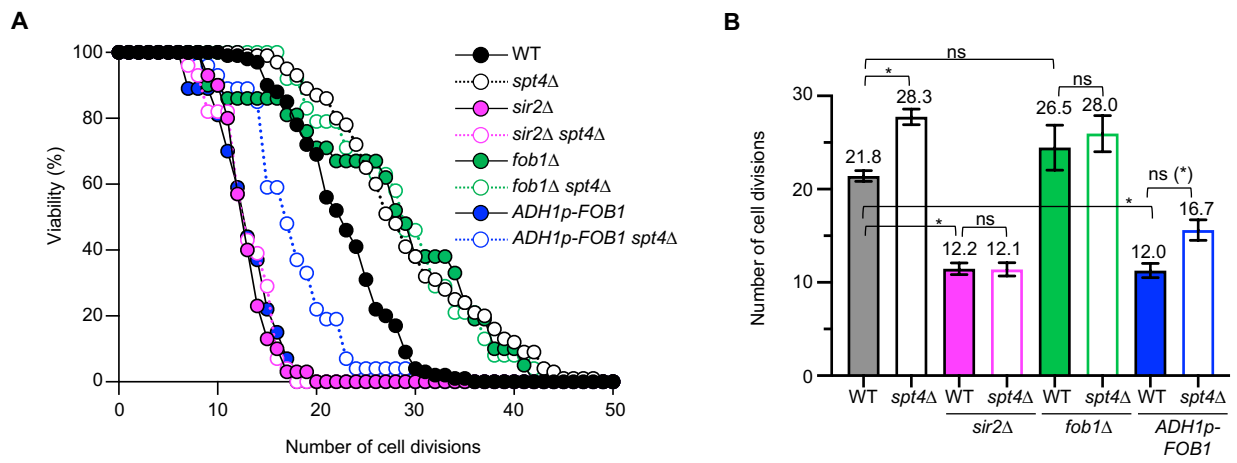

**Figure 5**

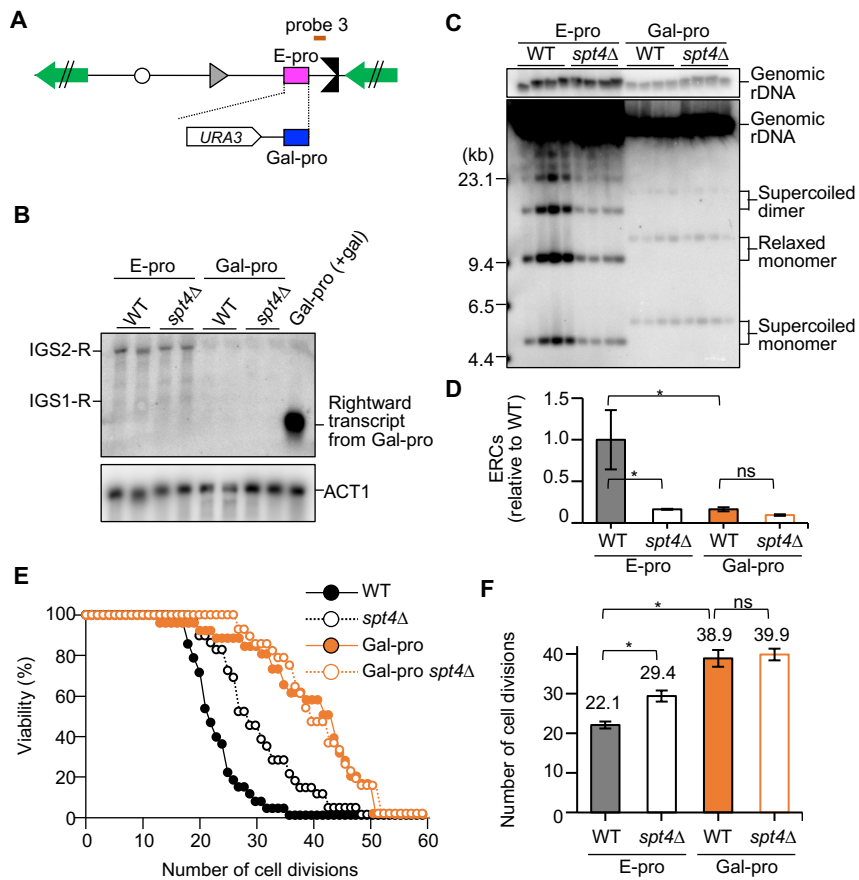

## Figure 6

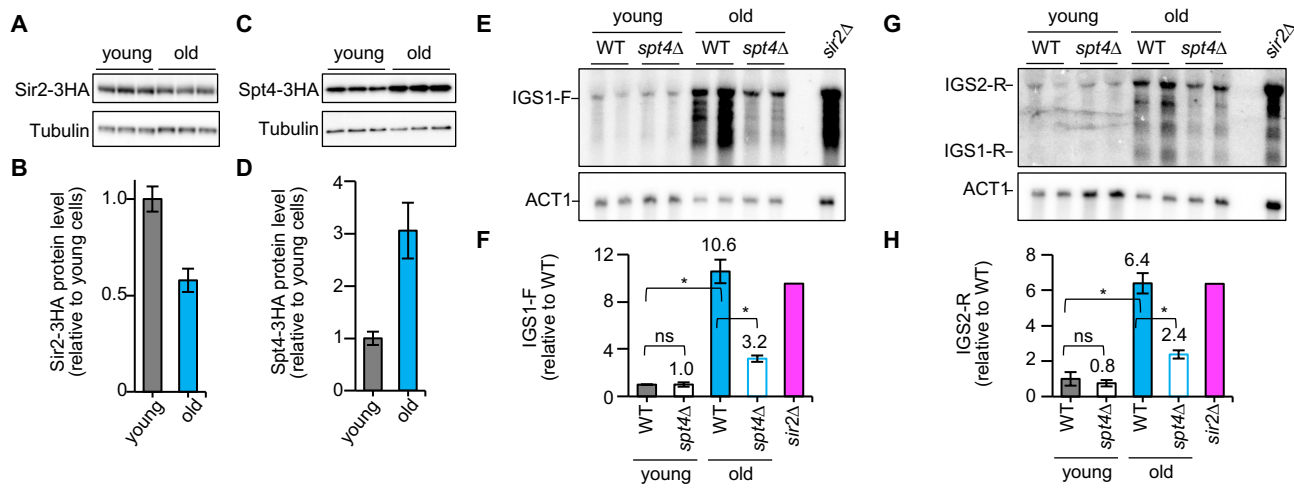

Figure 7

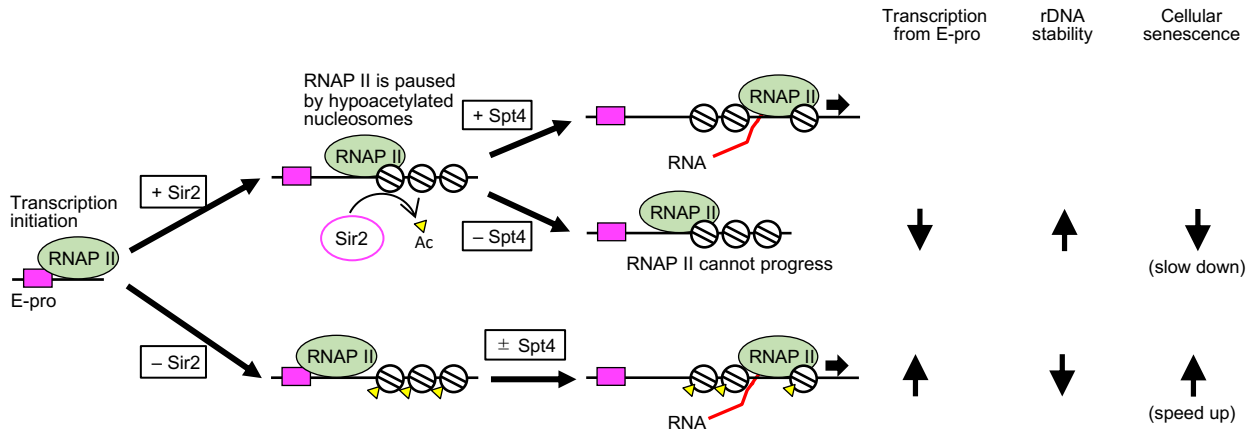

Figure S1

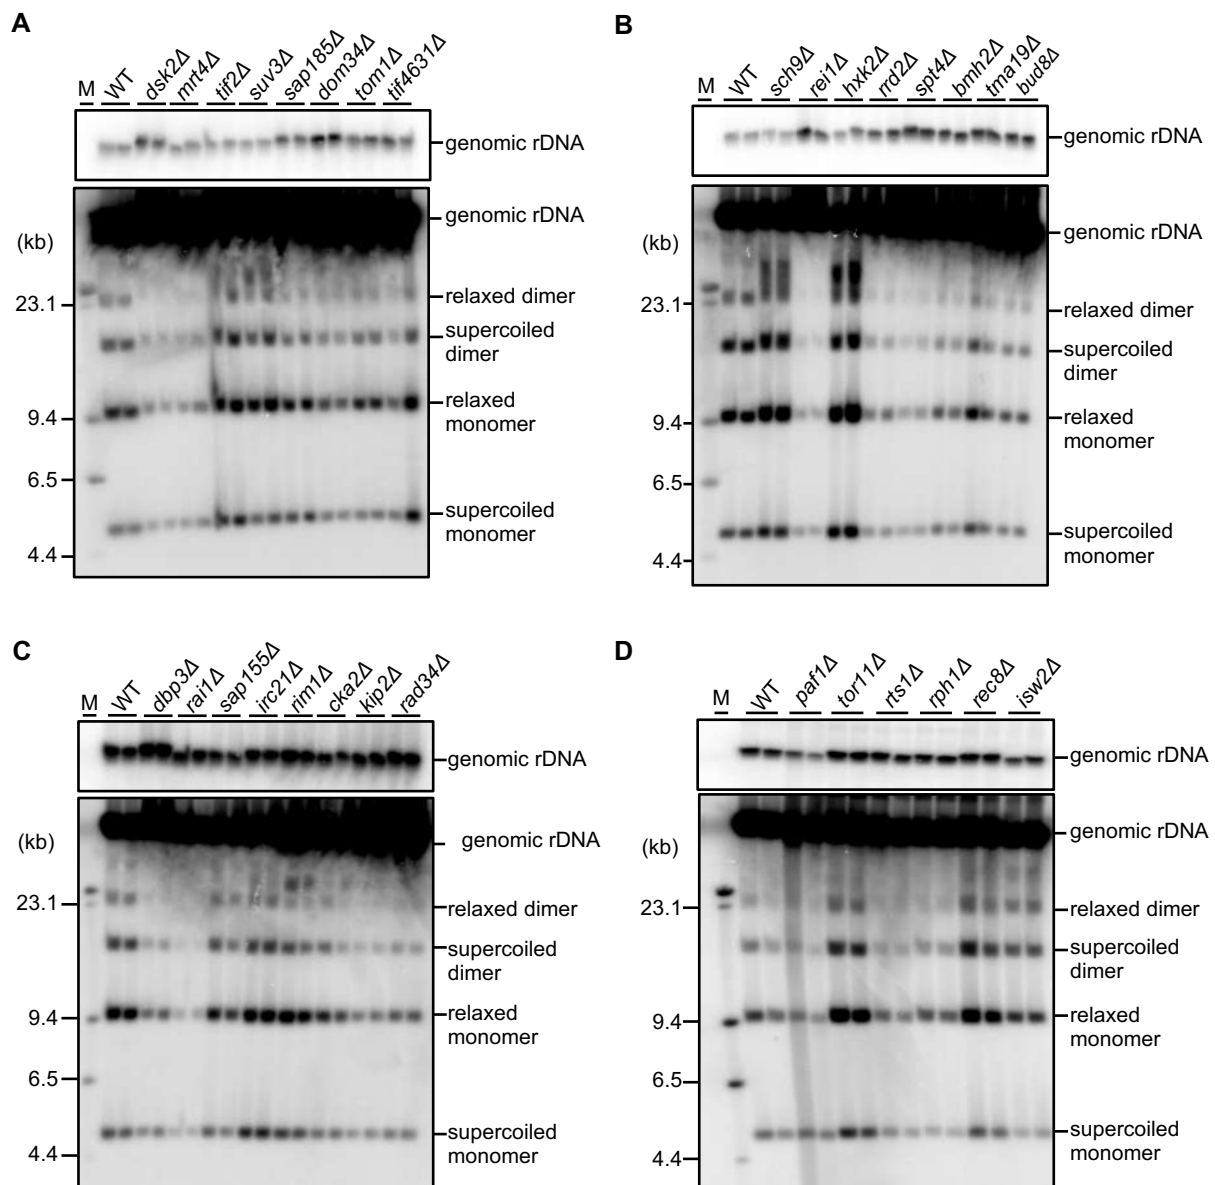

**Supplementary Table 1. *Saccharomyces cerevisiae* strains used in this study**

| Name   | Genotype                                     |
|--------|----------------------------------------------|
| YYM1   | <i>MATa</i>                                  |
| YYM78  | <i>MATa, dsk2Δ::kanMX</i>                    |
| YYM80  | <i>MATa, mrt4Δ::kanMX</i>                    |
| YYM82  | <i>MATa, tif2Δ::kanMX</i>                    |
| YYM84  | <i>MATa, suv3Δ::kanMX</i>                    |
| YYM86  | <i>MATa, sap185Δ::kanMX</i>                  |
| YYM88  | <i>MATa, dom34Δ::kanMX</i>                   |
| YYM90  | <i>MATa, tom1Δ::kanMX</i>                    |
| YYM92  | <i>MATa, paf1Δ::kanMX</i>                    |
| YYM94  | <i>MATa, tif4631Δ::kanMX</i>                 |
| YYM96  | <i>MATa, sch9Δ::kanMX</i>                    |
| YYM98  | <i>MATa, rei1Δ::kanMX</i>                    |
| YYM100 | <i>MATa, hxx2Δ::kanMX</i>                    |
| YYM102 | <i>MATa, rrd2Δ::kanMX</i>                    |
| YYM104 | <i>MATa, spt4Δ::kanMX</i>                    |
| YYM151 | <i>MATa, bmh2Δ::kanMX</i>                    |
| YYM152 | <i>MATa, tma19Δ::kanMX</i>                   |
| YYM153 | <i>MATa, bud8Δ::kanMX</i>                    |
| YYM154 | <i>MATa, dbp3Δ::kanMX</i>                    |
| YYM155 | <i>MATa, rai1Δ::kanMX</i>                    |
| YYM156 | <i>MATa, sap155Δ::kanMX</i>                  |
| YYM157 | <i>MATa, irc21Δ::kanMX</i>                   |
| YYM158 | <i>MATa, rim1Δ::kanMX</i>                    |
| YYM161 | <i>MATa, cka2Δ::kanMX</i>                    |
| YYM162 | <i>MATa, kip2Δ::kanMX</i>                    |
| YYM164 | <i>MATa, rad34Δ::kanMX</i>                   |
| YYM166 | <i>MATa, tor1Δ::kanMX</i>                    |
| YYM167 | <i>MATa, rts1Δ::kanMX</i>                    |
| YYM168 | <i>MATa, rph1Δ::kanMX</i>                    |
| YYM169 | <i>MATa, rec8Δ::kanMX</i>                    |
| YYM170 | <i>MATa, isw2Δ::kanMX</i>                    |
| YYM111 | <i>MATa, fob1::hphMX</i>                     |
| YYM172 | <i>MATa, sir2::hphMX</i>                     |
| YYM173 | <i>MATa, spt4Δ::kanMX, fob1::hphMX</i>       |
| YYM174 | <i>MATa, spt4Δ::kanMX, sir2::hphMX</i>       |
| YYM5   | <i>MATa, NatNT2-ADH1p-FOB1</i>               |
| YYM105 | <i>MATa, NatNT2-ADH1p-FOB1, spt4Δ::kanMX</i> |
| YYM20  | <i>MATa, FOB1-3HA-TRP1</i>                   |
| YYM15  | <i>MATa, NatNT2-ADH1p-FOB1-3HA-TRP1</i>      |

YYM137 *MATa, E-proΔ::GAL1/10-URA3, spt4Δ::kanMX*  
YYM142 *MATa, SPT4-3HA-TRP1*  
YYM163 *MATa, SIR2-3HA-TRP1*  
YYM179 *MATa, SIR2-3HA-TRP1, spt4Δ::kanMX*  
TAK204 *MATa, E-proΔ::GAL1/10-URA3*  
DAS540 *MATa, spt5-C292R*  
DAS541 *MATa, spt5-S324P, E427K*

---

All strains are derivatives of W303, which is *ade2-1, ura3-1, his3-11, 15, trp1-1, leu2-3, 112, can1-100*. TAK204 is used in a previous study (Kobayashi and Ganley, 2005). DAS540 and DAS541 are a kind gift of David Schneider (Anderson et al., 2011).
